# Supplementary material for: The Protective Potential of Aronia melanocarpa L. Berry Extract against Cadmium-Induced Kidney Damage: A Study in an Animal Model of Human Environmental Exposure to This Toxic Element
Source: MDPI journal article supplement (doi:10.3390/ijms241411647), 2023-07-19
Supplement: s1 [file s1]

**Table S1.** The concentration of kidney injury molecule-1 (KIM-1) and  $\beta_2$ -microglobulin ( $\beta_2$ -MG) in the urine of female rats.

| Group                            | Experiment Duration                     |                                           |                                            |                                            |
|----------------------------------|-----------------------------------------|-------------------------------------------|--------------------------------------------|--------------------------------------------|
|                                  | 3 Months                                | 10 Months                                 | 17 Months                                  | 24 Months                                  |
| KIM-1 (pg/mg Creatinine)         |                                         |                                           |                                            |                                            |
| Control                          | 96.71<br>32.22 – 222.6                  | 90.60<br>32.04 – 124.6                    | 179.4<br>26.29 – 212.5                     | 185.7<br>131.2 – 239.3                     |
| AM                               | 171.9<br>44.00 – 389.7                  | 97.79<br>58.20 – 152.2                    | 254.1<br>78.49 – 368.2                     | 260.2<br>161.7 – 293.3                     |
| Cd <sub>1</sub>                  | 509.8 <sup>a*</sup><br>200.8 – 1754     | 240.8 <sup>a*</sup><br>149.0 – 419.2      | 439.3 <sup>a†</sup><br>273.6 – 549.9       | 360.5<br>279.0 – 752.6                     |
| Cd <sub>1</sub> +AM              | 69.65 <sup>c*</sup><br>9.144 – 327.2    | 84.64 <sup>c*</sup><br>54.10 – 138.3      | 149.7 <sup>ct</sup><br>107.6 – 222.3       | 159.7 <sup>ct</sup><br>101.9 – 197.2       |
| Cd <sub>5</sub>                  | 544.0 <sup>a* d*</sup><br>190.4 – 834.1 | 876.8 <sup>a† b† d†</sup><br>569.2 – 1441 | 463.3 <sup>a† d†</sup><br>330.8 – 1050.8   | 418.7 <sup>a* d†</sup><br>363.4 – 525.5    |
| Cd <sub>5</sub> +AM              | 55.39 <sup>ct e†</sup><br>25.19 – 143.2 | 109.9 <sup>e*</sup><br>101.1 – 157.7      | 229.2 <sup>e*</sup><br>106.8 – 300.5       | 141.4 <sup>ct e†</sup><br>109.4 – 176.9    |
| $\beta_2$ -MG (ng/mg Creatinine) |                                         |                                           |                                            |                                            |
| Control                          | 2.114<br>1.353 – 5.483                  | 4.803<br>0.543 – 6.743                    | 4.381<br>0.740 – 5.816                     | 4.688<br>2.982 – 5.715                     |
| AM                               | 2.131<br>1.590 – 3.671                  | 2.663<br>1.486 – 4.713                    | 4.494<br>1.958 – 6.402                     | 4.965<br>3.521 – 5.943                     |
| Cd <sub>1</sub>                  | 2.780<br>1.495 – 5.356                  | 4.545<br>2.487 – 7.624                    | 7.119 <sup>a* b*</sup><br>5.876 – 13.95    | 10.24 <sup>a† b*</sup><br>7.430 – 20.92    |
| Cd <sub>1</sub> +AM              | 3.480<br>1.121 – 5.045                  | 4.309<br>1.038 – 6.561                    | 4.561 <sup>c*</sup><br>2.806 – 6.002       | 6.145 <sup>c*</sup><br>2.164 – 8.531       |
| Cd <sub>5</sub>                  | 2.661<br>2.051 – 5.192                  | 5.557<br>2.012 – 12.84                    | 11.23 <sup>a† b† d†</sup><br>10.02 – 20.14 | 16.94 <sup>a† b† d†</sup><br>11.40 – 23.44 |
| Cd <sub>5</sub> +AM              | 2.580<br>1.702 – 2.929                  | 2.542<br>1.196 – 8.299                    | 4.917 <sup>e†</sup><br>2.848 – 7.005       | 5.044 <sup>c* e*</sup><br>2.209 – 6.278    |

The animals were treated with cadmium (Cd) in the diet at the concentration of 0, 1, or 5 mg/kg (Control, Cd<sub>1</sub>, and Cd<sub>5</sub> groups) and/or 0.1% extract from the berries of *Aronia melanocarpa* L. (AM, Cd<sub>1</sub>+AM, and Cd<sub>5</sub>+AM groups) for 3, 10, 17, and 24 months. Data are shown as a median and minimum and maximum values for eight animals (except for seven females in the AM, Cd<sub>1</sub>, and Cd<sub>5</sub> groups after 24 months). Statistically significant differences (Kruskal–Wallis test) compared to: a—Control group; b—AM group; c—Cd<sub>1</sub> group; d—Cd<sub>1</sub>+AM group, and e—Cd<sub>5</sub> group, where \*  $p < 0.05$ , <sup>†</sup>  $p < 0.01$ , and <sup>‡</sup>  $p < 0.001$ , are marked.

**Table S2.** The concentration of  $\beta$ 2-microglobulin ( $\beta$ 2-MG) in the urine of female rats evaluated every other month during the 24-month study.

The animals were treated with cadmium (Cd) in the diet at the concentration of 0, 1, or 5 mg/kg (Control, Cd<sub>1</sub>, and Cd<sub>5</sub> groups) and/or 0.1% extract from the berries of *Aronia melanocarpa* L. (AM,

| Months        | Control                                 | AM                                     | Cd <sub>1</sub>                                        | Cd <sub>1</sub> +AM                                               | Cd <sub>5</sub>                                                                                                                                            | Cd <sub>5</sub> +AM                                                                                                                                |
|---------------|-----------------------------------------|----------------------------------------|--------------------------------------------------------|-------------------------------------------------------------------|------------------------------------------------------------------------------------------------------------------------------------------------------------|----------------------------------------------------------------------------------------------------------------------------------------------------|
| 0             | 2.368                                   | 2.319                                  | 2.482                                                  | 2.261                                                             | 2.221                                                                                                                                                      | 2.241                                                                                                                                              |
|               | 1.606 – 3.064                           | 1.227 – 3.194                          | 1.660 – 3.419                                          | 1.736 – 2.964                                                     | 1.608 – 2.921                                                                                                                                              | 1.637 – 2.861                                                                                                                                      |
| 2             | 3.557                                   | 2.862                                  | 3.148                                                  | 3.567                                                             | 3.886                                                                                                                                                      | 2.995                                                                                                                                              |
|               | 0.076 – 5.407                           | 0.592 – 7.981                          | 2.063 – 5.151                                          | 1.338 – 3.968                                                     | 1.040 – 4.431                                                                                                                                              | 1.741 – 4.676                                                                                                                                      |
| 4             | 2.963                                   | 2.006                                  | 2.423                                                  | 2.380                                                             | 2.123                                                                                                                                                      | 2.904                                                                                                                                              |
|               | 1.180 – 4.587                           | 1.197 – 3.330                          | 1.088 – 5.335                                          | 1.657 – 4.680                                                     | 0.484 – 6.224                                                                                                                                              | 0.052 – 8.989                                                                                                                                      |
| 6             | 3.801                                   | 4.025                                  | 5.357                                                  | 2.185 <sup>b†‡</sup>                                              | 3.422                                                                                                                                                      | 2.462 <sup>c†</sup>                                                                                                                                |
|               | 2.607 – 6.724                           | 2.932 – 5.064                          | 3.743 – 8.691                                          | 0.795 – 2.392                                                     | 1.908 – 4.717                                                                                                                                              | 1.141 – 4.894                                                                                                                                      |
| 8             | 2.967                                   | 2.811                                  | 5.071                                                  | 2.403 <sup>c†</sup>                                               | 5.095 <sup>b* d†</sup>                                                                                                                                     | 2.009 <sup>c†‡</sup>                                                                                                                               |
|               | 2.171 – 4.023                           | 1.106 – 4.319                          | 3.948 – 5.886                                          | 1.322 – 3.717                                                     | 4.085 – 6.042                                                                                                                                              | 1.433 – 2.368                                                                                                                                      |
| 10            | 3.889                                   | 2.930                                  | 7.402 <sup>b†</sup>                                    | 4.740                                                             | 6.113                                                                                                                                                      | 2.798 <sup>c*</sup>                                                                                                                                |
|               | 2.597 – 4.394                           | 1.635 – 5.185                          | 4.402 – 8.386                                          | 1.142 – 7.218                                                     | 3.213 – 8.032                                                                                                                                              | 1.316 – 6.469                                                                                                                                      |
| 12            | 3.970                                   | 3.474                                  | 8.368 <sup>b†</sup>                                    | 3.242 <sup>c†</sup>                                               | 8.842 <sup>a* b† d†</sup>                                                                                                                                  | 3.499 <sup>c†‡</sup>                                                                                                                               |
|               | 3.288 – 4.802                           | 1.708 – 5.445                          | 7.059 – 11.98                                          | 2.621 – 7.370                                                     | 6.893 – 12.42                                                                                                                                              | 1.176 – 5.669                                                                                                                                      |
| 14            | 4.321                                   | 5.047                                  | 8.500 <sup>a*</sup>                                    | 4.794                                                             | 8.722 <sup>a*</sup>                                                                                                                                        | 3.508 <sup>c†‡</sup>                                                                                                                               |
|               | 2.106 – 6.111                           | 2.446 – 7.757                          | 5.665 – 13.40                                          | 3.870 – 7.917                                                     | 6.301 – 10.72                                                                                                                                              | 1.687 – 5.491                                                                                                                                      |
| 16            | 3.983                                   | 4.085                                  | 7.992 <sup>a† b*</sup>                                 | 4.677 <sup>c*</sup>                                               | 11.07 <sup>a† b† d†</sup>                                                                                                                                  | 4.907 <sup>c*</sup>                                                                                                                                |
|               | 1.673 – 5.211                           | 1.780 – 5.820                          | 6.389 – 15.41                                          | 2.551 – 6.252                                                     | 9.514 – 20.22                                                                                                                                              | 5.879 – 2.589                                                                                                                                      |
| 18            | 4.802                                   | 5.142                                  | 12.39 <sup>a† b†</sup>                                 | 8.128 <sup>c*</sup>                                               | 11.17 <sup>a† b*</sup>                                                                                                                                     | 6.426 <sup>c†‡</sup>                                                                                                                               |
|               | 4.128 – 10.11                           | 4.539 – 5.846                          | 10.50 – 20.66                                          | 4.518 – 9.939                                                     | 9.380 – 19.75                                                                                                                                              | 5.195 – 7.215                                                                                                                                      |
| 20            | 5.339                                   | 5.318                                  | 10.42 <sup>a*</sup>                                    | 4.099 <sup>c†</sup>                                               | 10.81 <sup>a*</sup>                                                                                                                                        | 5.029 <sup>e†‡</sup>                                                                                                                               |
|               | 3.308 – 7.994                           | 3.893 – 7.017                          | 8.405 – 17.71                                          | 2.696 – 7.795                                                     | 8.956 – 15.18                                                                                                                                              | 3.372 – 6.585                                                                                                                                      |
| 22            | 5.936                                   | 5.378                                  | 17.01 <sup>a†</sup>                                    | 6.033 <sup>c†</sup>                                               | 16.43 <sup>a† d†</sup>                                                                                                                                     | 7.106 <sup>c*</sup>                                                                                                                                |
|               | 4.162 – 7.605                           | 3.808 – 6.788                          | 10.11 – 21.99                                          | 3.961 – 8.432                                                     | 11.36 – 31.46                                                                                                                                              | 5.040 – 9.443                                                                                                                                      |
| 24            | 4.688                                   | 4.965                                  | 10.24 <sup>a† b*</sup>                                 | 6.145 <sup>c*</sup>                                               | 16.94 <sup>a† b† d†</sup>                                                                                                                                  | 5.044 <sup>c*‡</sup>                                                                                                                               |
|               | 2.982 – 5.715                           | 3.521 – 5.943                          | 7.430 – 20.92                                          | 2.164 – 8.531                                                     | 11.40 – 23.44                                                                                                                                              | 2.209 – 6.278                                                                                                                                      |
| Friedman Test | $p < 0.001$                             | $p < 0.001$                            | $p < 0.001$                                            | $p < 0.001$                                                       | $p < 0.001$                                                                                                                                                | $p < 0.001$                                                                                                                                        |
| Wilcoxon Test | 0 – 6, 10...24 *<br>2 – 22 *            | 0 – 6, 12...24 *<br>4 – 6, 10...24 *   | 0 – 6...24 *<br>2 – 6...24 *                           | 0 – 2, 10...24 *<br>2 – 6, 14...18, 22, 24 *                      | 0 – 2, 6 *<br>0 – 8...24 †                                                                                                                                 | 0 – 2, 12, 16 *<br>0 – 16...24 †                                                                                                                   |
|               | 4 – 12, 18...24 *<br>6 – 18, 22 *       | 6 – 10, 18...22 *<br>8 – 14, 18...24 * | 4 – 6...24 *<br>6 – 12, 16...24 *                      | 4 – 14... 24 *<br>6 – 10...24 †                                   | 2 – 8, 12...24 †<br>2 – 10 *                                                                                                                               | 2 – 8, 20, 24 *<br>2 – 18, 22 †                                                                                                                    |
|               | 8 – 10, 12, 18...24 *<br>10 – 18...22 * | 10 – 18...24 *<br>12 – 14, 18...24 *   | 8 – 12...24 *<br>10 – 12 *                             | 8 – 10 *<br>8 – 12...24 †                                         | 4 – 8, 10 *<br>4 – 12...24 †                                                                                                                               | 6 – 16, 20, 24 *<br>6 – 18, 22 †                                                                                                                   |
|               | 12 – 18...22 *<br>16 – 20, 22 *         | 16 – 20, 22 *                          | 10 – 18...24 *<br>12 – 18...24 *                       | 10 – 18 *<br>12 – 18 †                                            | 6 – 10 *<br>6 – 8, 12...24 †                                                                                                                               | 8 – 10, 12, 14 *<br>8 – 16...24 †                                                                                                                  |
|               | 22 – 24 *                               |                                        | 14 – 18, 22 *<br>16 – 18, 22 *<br>20 – 22<br>20 – 22 * | 12 – 22 *<br>14 – 18 *<br>16 – 18, 22 †<br>18 – 20 †<br>20 – 22 † | 8 – 12...24 †<br>10 – 12, 16...24 †<br>10 – 14 *<br>12 – 16, 22, 24 *<br>14 – 16, 22, 24 †<br>14 – 18, 20 *<br>16 – 24 *<br>18 – 22, 24 *<br>20 – 22, 24 * | 10 – 18 †<br>10 – 22 *<br>12 – 18, 22 †<br>12 – 20, 24 *<br>14 – 16, 20 *<br>14 – 18, 22 †<br>16 – 18, 22 †<br>18 – 24 *<br>20 – 22 †<br>22 – 24 * |

Cd<sub>1</sub>+AM, and Cd<sub>5</sub>+AM groups) for 24 months. Data are shown as a median and minimum and maximum values for eight animals (except for seven females in the AE, Cd<sub>1</sub>, and Cd<sub>5</sub> groups after 20, 22, and 24 months). Statistically significant differences (Kruskal–Wallis test) compared to: a—Control group; b—AM group; c—Cd<sub>1</sub> group; d—Cd<sub>1</sub>+AM group; and e—Cd<sub>5</sub> group. Wilcoxon test was performed to compare data between particular two time points in the same animals during the 24-month study. \*  $p < 0.05$ , †  $p < 0.01$ , and ‡  $p < 0.001$ .

**Table S3.** The activities of N-acetyl- $\beta$ -D-glucosaminidase (NAG) and alkaline phosphatase (ALP) in the urine of female rats.

| Group               | Experiment Duration    |                                            |                                            |                                            |
|---------------------|------------------------|--------------------------------------------|--------------------------------------------|--------------------------------------------|
|                     | 3 Months               | 10 Months                                  | 17 Months                                  | 24 Months                                  |
| NAG (U/L)           |                        |                                            |                                            |                                            |
| Control             | 85.25<br>60.38 – 114.1 | 126.6<br>68.55 – 166.7                     | 113.9<br>87.03 – 156.6                     | 137.6<br>68.78 – 154.8                     |
| AM                  | 95.34<br>63.27 – 116.6 | 111.0<br>61.20 – 145.4                     | 123.9<br>77.49 – 137.1                     | 116.6<br>76.75 – 160.8                     |
| Cd <sub>1</sub>     | 104.5<br>53.87 – 132.5 | 636.0 <sup>b†</sup><br>380.7 – 801.9       | 520.09 <sup>a† b*</sup><br>387.9 – 776.9   | 3056 <sup>a* b*</sup><br>2971 – 4112       |
| Cd <sub>1</sub> +AM | 93.65<br>67.78 – 116.0 | 141.7<br>92.99 – 230.1                     | 121.7 <sup>c†</sup><br>90.41 – 162.7       | 117.1 <sup>c†</sup><br>93.61 – 141.5       |
| Cd <sub>5</sub>     | 93.46<br>75.54 – 120.8 | 800.4 <sup>a† b† d*</sup><br>347.7 – 935.5 | 596.9 <sup>a† b* d†</sup><br>496.0 – 769.4 | 3453 <sup>a* b† d†</sup><br>2999 – 4836    |
| Cd <sub>5</sub> +AM | 92.83<br>41.47 – 116.5 | 108.1 <sup>c† e†</sup><br>46.10 – 173.3    | 129.7 <sup>c*</sup><br>94.98 – 152.2       | 131.9 <sup>e†</sup><br>96.65 – 148.9       |
| ALP (U/L)           |                        |                                            |                                            |                                            |
| Control             | 39.22<br>27.41 – 68.93 | 42.45<br>10.90 – 70.19                     | 36.82<br>30.52 – 71.00                     | 38.08<br>24.11 – 113.0                     |
| AM                  | 27.16<br>16.80 – 57.10 | 36.70<br>24.81 – 79.00                     | 37.81<br>35.84 – 41.36                     | 34.00<br>28.71 – 102.0                     |
| Cd <sub>1</sub>     | 31.99<br>23.80 – 69.30 | 146.9 <sup>a† b†</sup><br>99.75 – 192.0    | 96.05 <sup>a† b†</sup><br>69.84 – 139.7    | 149.9 <sup>a*</sup><br>105.7 – 208.8       |
| Cd <sub>1</sub> +AM | 32.08<br>27.57 – 35.84 | 60.66<br>31.46 – 79.95                     | 51.46<br>43.75 – 59.18                     | 49.60<br>26.10 – 120.0                     |
| Cd <sub>5</sub>     | 35.84<br>27.57 – 71.50 | 185.1 <sup>a† b† d*</sup><br>90.98 – 303.3 | 111.7 <sup>a† b†</sup><br>89.60 – 127.6    | 278.0 <sup>a† b† d†</sup><br>181.6 – 375.2 |
| Cd <sub>5</sub> +AM | 33.36<br>13.51 – 56.90 | 47.60 <sup>e†</sup><br>25.38 – 102.0       | 36.76 <sup>c† e†</sup><br>34.92 – 37.68    | 39.06 <sup>e†</sup><br>22.10 – 70.36       |

The animals were treated with cadmium (Cd) in the diet at the concentration of 0, 1, or 5 mg/kg (Control, Cd<sub>1</sub>, and Cd<sub>5</sub> groups) and/or 0.1% extract from the berries of *Aronia melanocarpa* L. (AM, Cd<sub>1</sub>+AM, and Cd<sub>5</sub>+AM groups) for 3, 10, 17, and 24 months. Data are shown as a median and minimum and maximum values for eight animals (except for seven females in the AM, Cd<sub>1</sub>, and Cd<sub>5</sub> groups after 24 months). Statistically significant differences (Kruskal–Wallis test) compared to: a—Control group; b—AM group; c—Cd<sub>1</sub> group; d—Cd<sub>1</sub>+AM group; and e—Cd<sub>5</sub> group, where \*  $p < 0.05$ , <sup>†</sup>  $p < 0.01$ , and <sup>‡</sup>  $p < 0.001$ , are marked.

**Table S4.** The activity of N-acetyl-β-D-glucosaminidase (NAG) in the urine of female rats evaluated every other month during the 24-month study.

| Months        | Control                         | AM                               | Cd <sub>1</sub>                         | Cd <sub>1</sub> +AM                  | Cd <sub>5</sub>                            | Cd <sub>5</sub> +AM                     |
|---------------|---------------------------------|----------------------------------|-----------------------------------------|--------------------------------------|--------------------------------------------|-----------------------------------------|
| 0             | 16.75<br>8.988 – 19.91          | 16.75<br>9.913 – 24.13           | 17.14<br>14.31 – 21.34                  | 16.68<br>11.99 – 19.90               | 16.43<br>7.280 – 19.91                     | 16.75<br>9.781 – 20.14                  |
| 2             | 78.08<br>22.65 – 104.9          | 89.21<br>47.80 – 103.3           | 61.01<br>14.57 – 85.23                  | 69.08<br>42.79 – 85.69               | 72.73<br>65.20 – 93.12                     | 39.17<br>27.11 – 71.12                  |
| 4             | 95.50<br>7.445 – 151.9          | 74.08<br>3.537 – 169.0           | 108.0<br>92.17 – 143.5                  | 106.4<br>49.72 – 169.1               | 106.5<br>36.47 – 180.6                     | 86.92<br>30.03 – 132.6                  |
| 6             | 115.3<br>89.10 – 123.9          | 63.15<br>31.55 – 120.5           | 117.1<br>72.58 – 150.7                  | 114.5<br>62.79 – 128.8               | 124.6<br>84.56 – 144.5                     | 110.0<br>75.24 – 133.7                  |
| 8             | 64.63<br>11.74 – 150.8          | 36.21<br>10.57 – 103.3           | 116.6 <sup>b†</sup><br>89.28 – 189.4    | 92.63<br>22.08 – 193.4               | 92.13<br>73.36 – 128.4                     | 105.4<br>29.44 – 142.6                  |
| 10            | 106.6<br>88.43 – 198.2          | 69.69<br>39.73 – 121.4           | 617.1 <sup>b†</sup><br>342.5 – 890.7    | 123.3<br>49.66 – 287.0               | 710.4 <sup>a* b† d*</sup><br>312.8 – 841.6 | 81.04 <sup>c† e†</sup><br>34.56 – 261.3 |
| 12            | 127.6<br>63.12 – 173.4          | 111.5<br>52.14 – 133.3           | 391.0 <sup>a† b†</sup><br>345.1 – 479.5 | 65.10 <sup>c†</sup><br>46.72 – 99.45 | 406.4 <sup>a† b† d†</sup><br>354.6 – 521.3 | 112.3 <sup>e*</sup><br>93.00 – 143.5    |
| 14            | 101.8<br>66.93 – 128.4          | 86.71<br>53.61 – 148.7           | 406.7 <sup>a* b*</sup><br>321.1 – 487.0 | 72.89 <sup>c†</sup><br>44.41 – 85.14 | 434.4 <sup>a* b† d†</sup><br>397.2 – 553.5 | 97.64 <sup>e*</sup><br>74.00 – 111.5    |
| 16            | 104.6<br>69.24 – 127.0          | 78.09<br>50.17 – 138.1           | 490.0 <sup>a* b†</sup><br>371.7 – 745.5 | 99.79 <sup>c*</sup><br>58.30 – 117.3 | 572.7 <sup>a† b† d†</sup><br>475.9 – 738.2 | 94.84 <sup>e†</sup><br>90.20 – 125.4    |
| 18            | 107.3<br>59.32 – 141.0          | 134.1<br>107.6 – 195.2           | 507.1 <sup>a†</sup><br>341.7 – 579.6    | 126.1 <sup>c*</sup><br>90.37 – 159.4 | 477.9 <sup>a† d†</sup><br>441.9 – 578.8    | 126.9 <sup>c* e†</sup><br>93.73 – 180.2 |
| 20            | 105.5<br>79.10 – 127.1          | 122.7<br>78.80 – 139.7           | 484.4 <sup>a*</sup><br>403.1 – 548.8    | 74.04 <sup>c†</sup><br>61.08 – 124.8 | 542.2 <sup>a† d†</sup><br>420.9 – 570.5    | 97.98 <sup>c* e†</sup><br>92.13 – 133.7 |
| 22            | 127.5<br>118.4 – 171.9          | 129.9<br>107.7 – 192.3           | 2319 <sup>a* b*</sup><br>1990 – 3188    | 132.4 <sup>c*</sup><br>97.44 – 150.7 | 3132 <sup>a† b† d†</sup><br>2727 – 4396    | 156.4 <sup>e*</sup><br>122.5 – 210.8    |
| 24            | 137.6<br>68.78 – 154.8          | 116.6<br>76.75 – 160.8           | 3056 <sup>a* b*</sup><br>2971 – 4112    | 117.1 <sup>c*</sup><br>93.61 – 141.5 | 3453 <sup>a* b† d†</sup><br>2999 – 4836    | 131.9 <sup>e†</sup><br>96.65 – 148.9    |
| Friedman Test | $p < 0.001$                     | $p < 0.001$                      | $p < 0.001$                             | $p < 0.001$                          | $p < 0.001$                                | $p < 0.001$                             |
| Wilcoxon Test | 0 – 2...24 <sup>†</sup>         | 0 – 2, 6, 10...18 <sup>†</sup>   | 0 – 2, 20...24 <sup>*</sup>             | 0 – 2...24 <sup>†</sup>              | 0 – 2...18 <sup>†</sup>                    | 0 – 2...24 <sup>†</sup>                 |
|               | 2 – 6, 10, 22 <sup>†</sup>      | 0 – 4, 8, 20...24 <sup>*</sup>   | 0 – 4...18 <sup>†</sup>                 | 2 – 4...10, 16, 20 <sup>*</sup>      | 0 – 20...24 <sup>*</sup>                   | 2 – 4, 8, 10 <sup>*</sup>               |
|               | 2 – 12, 16, 20, 24 <sup>*</sup> | 2 – 18 <sup>†</sup>              | 2 – 4...18 <sup>†</sup>                 | 2 – 18, 22, 24 <sup>†</sup>          | 2 – 4, 20...24 <sup>*</sup>                | 2 – 6, 12...24 <sup>†</sup>             |
|               | 6 – 22 <sup>†</sup>             | 2 – 20...24 <sup>*</sup>         | 2 – 20...24 <sup>*</sup>                | 4 – 12, 14 <sup>†</sup>              | 2 – 6...18 <sup>†</sup>                    | 4 – 12, 18, 22 <sup>†</sup>             |
|               | 8 – 22 <sup>*</sup>             | 4 – 18, 22 <sup>*</sup>          | 4 – 10...18 <sup>†</sup>                | 6 – 12, 14 <sup>†</sup>              | 4 – 10...18 <sup>†</sup>                   | 4 – 16, 20, 24 <sup>*</sup>             |
|               | 14 – 22 <sup>*</sup>            | 6 – 18 <sup>†</sup>              | 4 – 20...24 <sup>*</sup>                | 6 – 20 <sup>*</sup>                  | 4 – 20...24 <sup>*</sup>                   | 6 – 22 <sup>†</sup>                     |
|               | 16 – 22 <sup>†</sup>            | 6 – 20, 22 <sup>*</sup>          | 6 – 10...18 <sup>†</sup>                | 10 – 12 <sup>†</sup>                 | 6 – 10...18 <sup>†</sup>                   | 8 – 22 <sup>†</sup>                     |
|               | 16 – 24 <sup>*</sup>            | 8 – 12, 16, 20...24 <sup>*</sup> | 6 – 20...24 <sup>*</sup>                | 10 – 14 <sup>*</sup>                 | 6 – 20...24 <sup>*</sup>                   | 12 – 14, 16 <sup>*</sup>                |
|               | 18 – 22 <sup>†</sup>            | 8 – 18 <sup>†</sup>              | 8 – 10...18 <sup>†</sup>                | 12 – 16, 18, 22, 24 <sup>†</sup>     | 8 – 10...18 <sup>†</sup>                   | 12 – 22 <sup>†</sup>                    |
|               | 20 – 22 <sup>*</sup>            | 10 – 18 <sup>†</sup>             | 8 – 20...24 <sup>*</sup>                | 14 – 16 <sup>*</sup>                 | 8 – 20...24 <sup>*</sup>                   | 14 – 18, 24 <sup>*</sup>                |
|               |                                 | 10 – 20...24 <sup>*</sup>        | 10 – 12, 14, 18, 22, 24 <sup>*</sup>    | 14 – 18, 22, 24 <sup>†</sup>         | 10 – 12, 14, 18...24 <sup>*</sup>          | 14 – 22 <sup>†</sup>                    |
|               |                                 | 12 – 18 <sup>*</sup>             | 12 – 16...24 <sup>*</sup>               | 16 – 18, 24 <sup>*</sup>             | 12 – 16, 22, 24 <sup>*</sup>               | 16 – 18, 24 <sup>*</sup>                |
|               |                                 | 14 – 18 <sup>*</sup>             | 14 – 20...24 <sup>*</sup>               | 16 – 22 <sup>†</sup>                 | 14 – 16, 22, 24 <sup>*</sup>               | 16 – 22 <sup>†</sup>                    |
|               |                                 | 16 – 18...24 <sup>*</sup>        | 16 – 22, 24 <sup>*</sup>                | 18 – 20 <sup>*</sup>                 | 16 – 22, 24 <sup>*</sup>                   | 18 – 22 <sup>*</sup>                    |
|               |                                 |                                  | 18 – 22, 24 <sup>*</sup>                | 20 – 22 <sup>†</sup>                 | 18 – 22, 24 <sup>*</sup>                   | 20 – 22 <sup>†</sup>                    |
|               |                                 |                                  | 20 – 22, 24 <sup>*</sup>                | 20 – 24 <sup>*</sup>                 | 20 – 22, 24 <sup>*</sup>                   | 20 – 24 <sup>*</sup>                    |
|               |                                 |                                  | 22 – 24 <sup>*</sup>                    |                                      | 22 – 24 <sup>*</sup>                       | 22 – 24 <sup>*</sup>                    |

The animals were treated with cadmium (Cd) in the diet at the concentration of 0, 1, or 5 mg/kg (Control, Cd<sub>1</sub>, and Cd<sub>5</sub> groups) and/or 0.1% extract from the berries of *Aronia melanocarpa* L. (AM, Cd<sub>1</sub>+AM, and Cd<sub>5</sub>+AM groups) for 24 months. Data are shown as a median and minimum and maximum values for eight animals (except for seven females in the AE, Cd<sub>1</sub>, and Cd<sub>5</sub> groups after 20, 22, and 24 months). Statistically significant differences (Kruskal–Wallis test) compared to: a—Control group; b—AM group; c—Cd<sub>1</sub> group; d—Cd<sub>1</sub>+AM group; and e—Cd<sub>5</sub> group. Wilcoxon test was performed to compare data between particular two time points in the same animals during the 24-month study. \*  $p < 0.05$ , <sup>†</sup>  $p < 0.01$ , and <sup>‡</sup>  $p < 0.001$ .

**Table S5.** The activity of alkaline phosphatase (ALP) in the urine of female rats evaluated every other month during the 24-month study.

| Months        | Control                                                                                                                                     | AM            | Cd <sub>1</sub>                                                                                                                                                                                                                                                                                                                                                                             | Cd <sub>1</sub> +AM                                                                                                                                                              | Cd <sub>5</sub>                                                                                                                                                                                                                                                                                                                                                             | Cd <sub>5</sub> +AM                                                                                                                                                                                                                                                                                                                                   |
|---------------|---------------------------------------------------------------------------------------------------------------------------------------------|---------------|---------------------------------------------------------------------------------------------------------------------------------------------------------------------------------------------------------------------------------------------------------------------------------------------------------------------------------------------------------------------------------------------|----------------------------------------------------------------------------------------------------------------------------------------------------------------------------------|-----------------------------------------------------------------------------------------------------------------------------------------------------------------------------------------------------------------------------------------------------------------------------------------------------------------------------------------------------------------------------|-------------------------------------------------------------------------------------------------------------------------------------------------------------------------------------------------------------------------------------------------------------------------------------------------------------------------------------------------------|
| 0             | 24.34                                                                                                                                       | 22.96         | 23.64                                                                                                                                                                                                                                                                                                                                                                                       | 22.06                                                                                                                                                                            | 24.34                                                                                                                                                                                                                                                                                                                                                                       | 24.34                                                                                                                                                                                                                                                                                                                                                 |
|               | 15.93 – 34.90                                                                                                                               | 15.14 – 34.90 | 13.59 – 33.08                                                                                                                                                                                                                                                                                                                                                                               | 19.53 – 33.84                                                                                                                                                                    | 11.03 – 30.33                                                                                                                                                                                                                                                                                                                                                               | 19.53 – 33.94                                                                                                                                                                                                                                                                                                                                         |
| 2             | 24.42                                                                                                                                       | 27.57         | 22.06                                                                                                                                                                                                                                                                                                                                                                                       | 13.39                                                                                                                                                                            | 38.59                                                                                                                                                                                                                                                                                                                                                                       | 33.08                                                                                                                                                                                                                                                                                                                                                 |
|               | 22.06 – 33.08                                                                                                                               | 22.06 – 55.14 | 11.03 – 33.08                                                                                                                                                                                                                                                                                                                                                                               | 11.03 – 22.06                                                                                                                                                                    | 21.31 – 88.22                                                                                                                                                                                                                                                                                                                                                               | 22.48 – 55.14                                                                                                                                                                                                                                                                                                                                         |
| 4             | 26.77                                                                                                                                       | 29.97         | 40.00                                                                                                                                                                                                                                                                                                                                                                                       | 42.36                                                                                                                                                                            | 128.2 <sup>a* b*</sup>                                                                                                                                                                                                                                                                                                                                                      | 55.14                                                                                                                                                                                                                                                                                                                                                 |
|               | 19.30 – 46.87                                                                                                                               | 15.16 – 49.63 | 30.33 – 52.38                                                                                                                                                                                                                                                                                                                                                                               | 11.03 – 68.93                                                                                                                                                                    | 38.59 – 140.6                                                                                                                                                                                                                                                                                                                                                               | 5.514 – 204                                                                                                                                                                                                                                                                                                                                           |
| 6             | 27.57                                                                                                                                       | 31.25         | 59.67                                                                                                                                                                                                                                                                                                                                                                                       | 39.21                                                                                                                                                                            | 119.5 <sup>a† b†</sup>                                                                                                                                                                                                                                                                                                                                                      | 79.55 <sup>a* b*</sup>                                                                                                                                                                                                                                                                                                                                |
|               | 22.06 – 38.60                                                                                                                               | 24.81 – 43.25 | 27.57 – 132.3                                                                                                                                                                                                                                                                                                                                                                               | 32.45 – 82.71                                                                                                                                                                    | 66.17 – 187.5                                                                                                                                                                                                                                                                                                                                                               | 41.36 – 173.7                                                                                                                                                                                                                                                                                                                                         |
| 8             | 39.61                                                                                                                                       | 41.36         | 73.80                                                                                                                                                                                                                                                                                                                                                                                       | 55.14                                                                                                                                                                            | 125.3 <sup>a*</sup>                                                                                                                                                                                                                                                                                                                                                         | 27.57 <sup>e†</sup>                                                                                                                                                                                                                                                                                                                                   |
|               | 13.79 – 81.96                                                                                                                               | 27.57 – 82.71 | 44.11 – 121.3                                                                                                                                                                                                                                                                                                                                                                               | 13.78 – 132.4                                                                                                                                                                    | 55.14 – 198.5                                                                                                                                                                                                                                                                                                                                                               | 16.54 – 82.71                                                                                                                                                                                                                                                                                                                                         |
| 10            | 40.38                                                                                                                                       | 37.22         | 114.2 <sup>a* b†</sup>                                                                                                                                                                                                                                                                                                                                                                      | 54.22                                                                                                                                                                            | 178.5 <sup>a† b† d*</sup>                                                                                                                                                                                                                                                                                                                                                   | 48.77 <sup>e†</sup>                                                                                                                                                                                                                                                                                                                                   |
|               | 13.25 – 56.97                                                                                                                               | 24.81 – 42.42 | 65.10 – 165.0                                                                                                                                                                                                                                                                                                                                                                               | 34.16 – 77.20                                                                                                                                                                    | 129.0 – 196.0                                                                                                                                                                                                                                                                                                                                                               | 28.53 – 92.00                                                                                                                                                                                                                                                                                                                                         |
| 12            | 28.27                                                                                                                                       | 27.57         | 97.13 <sup>a* b*</sup>                                                                                                                                                                                                                                                                                                                                                                      | 44.72                                                                                                                                                                            | 117.2 <sup>a† b†</sup>                                                                                                                                                                                                                                                                                                                                                      | 34.46 <sup>c* e†</sup>                                                                                                                                                                                                                                                                                                                                |
|               | 24.81 – 60.65                                                                                                                               | 18.55 – 58.47 | 42.81 – 139.9                                                                                                                                                                                                                                                                                                                                                                               | 24.81 – 65.42                                                                                                                                                                    | 77.19 – 159.9                                                                                                                                                                                                                                                                                                                                                               | 5.514 – 57.89                                                                                                                                                                                                                                                                                                                                         |
| 14            | 32.43                                                                                                                                       | 36.18         | 89.76 <sup>a*</sup>                                                                                                                                                                                                                                                                                                                                                                         | 42.79                                                                                                                                                                            | 104.5 <sup>a† b*</sup>                                                                                                                                                                                                                                                                                                                                                      | 25.23 <sup>c† e†</sup>                                                                                                                                                                                                                                                                                                                                |
|               | 13.78 – 68.93                                                                                                                               | 23.78 – 52.38 | 44.11 – 170.9                                                                                                                                                                                                                                                                                                                                                                               | 27.57 – 79.95                                                                                                                                                                    | 86.66 – 130.0                                                                                                                                                                                                                                                                                                                                                               | 19.21 – 44.22                                                                                                                                                                                                                                                                                                                                         |
| 16            | 33.32                                                                                                                                       | 31.89         | 85.75 <sup>a* b*</sup>                                                                                                                                                                                                                                                                                                                                                                      | 39.18                                                                                                                                                                            | 121.0 <sup>a† b† d*</sup>                                                                                                                                                                                                                                                                                                                                                   | 30.63 <sup>c† e†</sup>                                                                                                                                                                                                                                                                                                                                |
|               | 29.87 – 59.17                                                                                                                               | 29.87 – 36.33 | 58.20 – 116.5                                                                                                                                                                                                                                                                                                                                                                               | 29.10 – 60.33                                                                                                                                                                    | 101.1 – 125.6                                                                                                                                                                                                                                                                                                                                                               | 29.10 – 31.40                                                                                                                                                                                                                                                                                                                                         |
| 18            | 36.53                                                                                                                                       | 22.52         | 95.12 <sup>a* b*</sup>                                                                                                                                                                                                                                                                                                                                                                      | 38.60                                                                                                                                                                            | 117.2 <sup>a† b†</sup>                                                                                                                                                                                                                                                                                                                                                      | 17.92 <sup>c† e†</sup>                                                                                                                                                                                                                                                                                                                                |
|               | 21.14 – 44.06                                                                                                                               | 20.22 – 45.03 | 50.55 – 133.3                                                                                                                                                                                                                                                                                                                                                                               | 25.73 – 42.81                                                                                                                                                                    | 96.50 – 160.8                                                                                                                                                                                                                                                                                                                                                               | 8.271 – 20.72                                                                                                                                                                                                                                                                                                                                         |
| 20            | 38.14                                                                                                                                       | 34.00         | 95.58 <sup>a*</sup>                                                                                                                                                                                                                                                                                                                                                                         | 43.19                                                                                                                                                                            | 108.2 <sup>a†</sup>                                                                                                                                                                                                                                                                                                                                                         | 33.84 <sup>c† e†</sup>                                                                                                                                                                                                                                                                                                                                |
|               | 31.25 – 51.46                                                                                                                               | 22.06 – 61.57 | 70.76 – 136.8                                                                                                                                                                                                                                                                                                                                                                               | 21.14 – 66.17                                                                                                                                                                    | 84.03 – 119.7                                                                                                                                                                                                                                                                                                                                                               | 20.22 – 44.11                                                                                                                                                                                                                                                                                                                                         |
| 22            | 35.54                                                                                                                                       | 30.65         | 91.29 <sup>a*</sup>                                                                                                                                                                                                                                                                                                                                                                         | 44.11                                                                                                                                                                            | 123.0 <sup>a† b† d†</sup>                                                                                                                                                                                                                                                                                                                                                   | 35.03 <sup>e†</sup>                                                                                                                                                                                                                                                                                                                                   |
|               | 26.65 – 44.06                                                                                                                               | 22.98 – 55.14 | 61.57 – 123.2                                                                                                                                                                                                                                                                                                                                                                               | 20.22 – 71.16                                                                                                                                                                    | 92.41 – 124.8                                                                                                                                                                                                                                                                                                                                                               | 22.06 – 77.20                                                                                                                                                                                                                                                                                                                                         |
| 24            | 38.08                                                                                                                                       | 34.00         | 149.9 <sup>a*</sup>                                                                                                                                                                                                                                                                                                                                                                         | 49.60                                                                                                                                                                            | 278.0 <sup>a† b† d†</sup>                                                                                                                                                                                                                                                                                                                                                   | 39.06 <sup>e†</sup>                                                                                                                                                                                                                                                                                                                                   |
|               | 24.11 – 113.0                                                                                                                               | 28.71 – 102.0 | 105.7 – 208.8                                                                                                                                                                                                                                                                                                                                                                               | 26.10 – 120.0                                                                                                                                                                    | 181.6 – 375.2                                                                                                                                                                                                                                                                                                                                                               | 22.10 – 70.36                                                                                                                                                                                                                                                                                                                                         |
| Friedman Test | $p < 0.001$                                                                                                                                 | $p = 0.20$    | $p < 0.001$                                                                                                                                                                                                                                                                                                                                                                                 | $p < 0.001$                                                                                                                                                                      | $p < 0.001$                                                                                                                                                                                                                                                                                                                                                                 | $p < 0.001$                                                                                                                                                                                                                                                                                                                                           |
| Wilcoxon Test | 0 – 10, 12, 22, 24 <sup>*</sup><br>0 – 16, 20 <sup>†</sup><br>2 – 10, 16, 20 <sup>*</sup><br>2 – 22 <sup>†</sup><br>6 – 10, 20 <sup>*</sup> |               | 0 – 4, 8...18 <sup>†</sup><br>0 – 6, 20...24 <sup>*</sup><br>2 – 4, 8...18 <sup>†</sup><br>2 – 6, 20...24 <sup>*</sup><br>4 – 8, 12, 20...24 <sup>*</sup><br>4 – 10, 14...18 <sup>†</sup><br>6 – 24 <sup>*</sup><br>8 – 10, 24 <sup>*</sup><br>10 – 16 <sup>*</sup><br>12 – 24 <sup>*</sup><br>14 – 24 <sup>*</sup><br>16 – 24 <sup>*</sup><br>18 – 24 <sup>*</sup><br>22 – 24 <sup>*</sup> | 0 – 2, 8, 12, 16...22 <sup>*</sup><br>0 – 6, 10, 14, 24 <sup>†</sup><br>2 – 4, 20 <sup>*</sup><br>2 – 6...18, 22, 24 <sup>†</sup><br>8 – 22 <sup>*</sup><br>10 – 18 <sup>*</sup> | 0 – 4...18 <sup>†</sup><br>0 – 20...24 <sup>*</sup><br>2 – 4, 20...24 <sup>*</sup><br>2 – 6...18 <sup>†</sup><br>4 – 10, 24 <sup>*</sup><br>6 – 24 <sup>*</sup><br>8 – 24 <sup>*</sup><br>10 – 12, 18...24 <sup>*</sup><br>10 – 14, 16 <sup>†</sup><br>12 – 24 <sup>*</sup><br>14 – 24 <sup>†</sup><br>16 – 24 <sup>*</sup><br>18 – 24 <sup>*</sup><br>20 – 24 <sup>*</sup> | 0 – 2, 16, 20, 24 <sup>*</sup><br>0 – 6, 10, 18 <sup>†</sup><br>2 – 6 <sup>*</sup><br>2 – 18 <sup>†</sup><br>6 – 12, 20...24 <sup>*</sup><br>6 – 14...18 <sup>†</sup><br>8 – 18 <sup>*</sup><br>10 – 14, 16 <sup>*</sup><br>10 – 18 <sup>†</sup><br>14 – 18 <sup>†</sup><br>14 – 24 <sup>*</sup><br>16 – 18 <sup>†</sup><br>18 – 20...24 <sup>†</sup> |

The animals were treated with cadmium (Cd) in the diet at the concentration of 0, 1, or 5 mg/kg (Control, Cd<sub>1</sub>, and Cd<sub>5</sub> groups) and/or 0.1% extract from the berries of *Aronia melanocarpa* L. (AM, Cd<sub>1</sub>+AM, and Cd<sub>5</sub>+AM groups) for 24 months. Data are shown as a median and minimum and maximum values for eight animals (except for seven females in the AE, Cd<sub>1</sub>, and Cd<sub>5</sub> groups after 20, 22, and 24 months). Statistically significant differences (Kruskal–Wallis test) compared to: a—Control group; b—AM group; c—Cd<sub>1</sub> group; d—Cd<sub>1</sub>+AM group; and e—Cd<sub>5</sub> group. Wilcoxon test was performed to compare data between particular two time points in the same animals during the 24-month study. \*  $p < 0.05$ , <sup>†</sup>  $p < 0.01$ , and <sup>‡</sup>  $p < 0.001$ .

**Table S6.** The concentrations of albumin (ACR) and total protein (PCR) adjusted for creatinine concentration in the urine of female rats.

| Group                  | Experiment Duration    |                           |                           |                        |
|------------------------|------------------------|---------------------------|---------------------------|------------------------|
|                        | 3 Months               | 10 Months                 | 17 Months                 | 24 Months              |
| ACR (mg/mg Creatinine) |                        |                           |                           |                        |
| Control                | 6.369<br>3.541 – 8.987 | 8.282<br>6.359 – 13.17    | 8.837<br>7.225 – 9.645    | 9.537<br>7.461 – 11.32 |
| AM                     | 6.658<br>4.004 – 9.908 | 8.888<br>5.702 – 10.91    | 7.668<br>4.220 – 10.43    | 9.006<br>7.223 – 12.73 |
| Cd <sub>1</sub>        | 8.167<br>5.491 – 10.87 | 10.04<br>6.501 – 14.56    | 13.48 <sup>a*</sup> b*    | 21.34 <sup>a*</sup>    |
| Cd <sub>1</sub> +AM    | 7.732<br>6.244 – 8.377 | 9.038<br>2.602 – 11.75    | 13.94 <sup>a*</sup> b*    | 12.18 <sup>c*</sup>    |
| Cd <sub>5</sub>        | 9.400<br>6.156 – 11.13 | 9.500<br>6.810 – 17.24    | 22.45 <sup>a†</sup> b†    | 22.56 <sup>a†</sup> d* |
| Cd <sub>5</sub> +AM    | 7.355<br>4.764 – 9.541 | 5.716 <sup>c†</sup> d* e† | 11.79 <sup>e*</sup>       | 11.45 <sup>c†</sup> e† |
|                        |                        | 3.375 – 7.050             | 9.600 – 13.74             | 6.473 – 13.38          |
| PCR (mg/mg Creatinine) |                        |                           |                           |                        |
| Control                | 6.194<br>3.634 – 7.743 | 11.12<br>7.831 – 14.85    | 12.27<br>9.063 – 17.44    | 11.29<br>8.320 – 12.56 |
| AM                     | 7.494<br>2.978 – 13.09 | 9.020<br>6.737 – 13.96    | 9.230<br>8.375 – 23.80    | 11.68<br>10.36 – 20.00 |
| Cd <sub>1</sub>        | 7.329<br>3.473 – 12.99 | 38.00 <sup>a*</sup> b†    | 38.10 <sup>a*</sup> b†    | 64.28 <sup>a*</sup>    |
| Cd <sub>1</sub> +AM    | 8.175<br>3.454 – 14.75 | 9.500 <sup>c*</sup>       | 12.01 <sup>c*</sup>       | 8.986 <sup>c†</sup>    |
| Cd <sub>5</sub>        | 6.218<br>3.893 – 8.271 | 42.14 <sup>a†</sup> b† d† | 42.06 <sup>a*</sup> b† d† | 63.09 <sup>a*</sup> d† |
| Cd <sub>5</sub> +AM    | 8.289<br>6.380 – 12.31 | 12.40 <sup>e*</sup>       | 11.19 <sup>c†</sup> e†    | 10.71 <sup>e†</sup>    |
|                        |                        | 11.35 – 14.24             | 8.120 – 13.98             | 8.080 – 14.72          |

The animals were treated with cadmium (Cd) in the diet at the concentration of 0, 1, or 5 mg/kg (Control, Cd<sub>1</sub>, and Cd<sub>5</sub> groups) and/or 0.1% extract from the berries of *Aronia melanocarpa* L. (AM, Cd<sub>1</sub>+AM, and Cd<sub>5</sub>+AM groups) for 3, 10, 17, and 24 months. Data are shown as a median and minimum and maximum values for eight animals (except for seven females in the AM, Cd<sub>1</sub>, and Cd<sub>5</sub> groups after 24 months). Statistically significant differences (Kruskal–Wallis test) compared to: a—Control group; b—AM group; c—Cd<sub>1</sub> group; d—Cd<sub>1</sub>+AM group; and e—Cd<sub>5</sub> group, where \*  $p < 0.05$ , †  $p < 0.01$ , and ‡  $p < 0.001$ , are marked.

**Table S7.** The concentration of albumin in the urine adjusted for creatinine concentration (ACR) of female rats evaluated every other month during the 24-month study.

| Months        | Control                         | AM                           | Cd <sub>1</sub>                     | Cd <sub>1</sub> +AM                | Cd <sub>5</sub>                 | Cd <sub>5</sub> +AM           |
|---------------|---------------------------------|------------------------------|-------------------------------------|------------------------------------|---------------------------------|-------------------------------|
| 0             | 1.690                           | 1.677                        | 1.539                               | 1.740                              | 1.543                           | 1.412                         |
| 2             | 1.152 – 2.939                   | 1.025 – 2.316                | 0.986 – 2.940                       | 0.982 – 2.316                      | 0.931 – 2.155                   | 0.952 – 2.180                 |
| 4             | 6.186                           | 6.156                        | 6.475                               | 6.623                              | 6.818                           | 6.578                         |
| 6             | 3.591 – 7.423                   | 4.166 – 9.156                | 3.630 – 9.276                       | 3.926 – 8.001                      | 5.477 – 9.266                   | 3.824 – 8.632                 |
| 8             | 6.590                           | 7.872                        | 6.367                               | 3.991                              | 11.32                           | 6.754                         |
| 10            | 4.300 – 8.833                   | 3.551 – 8.703                | 3.834 – 9.528                       | 2.715 – 11.20                      | 6.790 – 15.62                   | 3.761 – 9.593                 |
| 12            | 6.745                           | 7.616                        | 14.06 <sup>a*</sup>                 | 5.647 <sup>‡</sup>                 | 10.08 <sup>d†</sup>             | 5.618 <sup>‡e†</sup>          |
| 14            | 5.486 – 8.882                   | 5.491 – 8.236                | 10.33 – 14.91                       | 4.516 – 6.288                      | 8.112 – 11.41                   | 3.950 – 7.141                 |
| 16            | 8.025                           | 7.013                        | 15.95 <sup>b†</sup>                 | 9.037                              | 13.76 <sup>b†</sup>             | 7.073 <sup>‡e†</sup>          |
| 18            | 4.945 – 13.68                   | 4.122 – 9.978                | 8.400 – 24.11                       | 6.491 – 15.03                      | 10.07 – 16.75                   | 5.664 – 8.014                 |
| 20            | 7.529                           | 8.080                        | 10.54                               | 9.490                              | 9.974                           | 6.001 <sup>‡d*†e†</sup>       |
| 22            | 5.781 – 11.98                   | 5.183 – 9.920                | 6.826 – 15.29                       | 2.732 – 12.34                      | 7.151 – 18.10                   | 3.544 – 7.403                 |
| 24            | 9.350                           | 6.675                        | 10.20                               | 11.65 <sup>b*</sup>                | 13.38 <sup>b†</sup>             | 7.914 <sup>a*</sup>           |
|               | 5.614 – 14.70                   | 4.185 – 9.656                | 5.433 – 16.38                       | 9.215 – 14.58                      | 9.778 – 17.77                   | 5.138 – 11.54                 |
|               | 11.81                           | 8.319                        | 11.75                               | 12.80 <sup>b*</sup>                | 14.68 <sup>b*</sup>             | 9.824 <sup>e*</sup>           |
|               | 8.065 – 17.17                   | 6.114 – 12.50                | 6.720 – 15.86                       | 11.30 – 16.21                      | 8.864 – 25.45                   | 6.527 – 11.93                 |
|               | 9.126                           | 8.408                        | 12.67                               | 11.14                              | 20.70 <sup>a†b†</sup>           | 9.534 <sup>e†</sup>           |
|               | 3.253 – 11.46                   | 4.773 – 17.37                | 7.988 – 24.71                       | 6.519 – 23.65                      | 16.73 – 23.64                   | 4.875 – 13.17                 |
|               | 8.345                           | 9.085                        | 14.44 <sup>a†b*</sup>               | 9.461 <sup>c*</sup>                | 16.18 <sup>a†b*†d*</sup>        | 9.313 <sup>e*</sup>           |
|               | 4.715 – 13.55                   | 6.327 – 15.42                | 12.31 – 21.86                       | 5.692 – 12.60                      | 13.55 – 20.21                   | 7.799 – 13.72                 |
|               | 9.239                           | 9.781                        | 18.86 <sup>a*</sup>                 | 10.10 <sup>c*</sup>                | 22.45 <sup>a†b*</sup>           | 11.40 <sup>e*</sup>           |
|               | 5.389 – 13.16                   | 3.432 – 20.66                | 14.37 – 20.77                       | 8.035 – 20.38                      | 16.84 – 25.87                   | 11.07 – 17.16                 |
|               | 9.626                           | 9.315                        | 22.77 <sup>a†b†</sup>               | 11.96 <sup>c*</sup>                | 22.72 <sup>a†b†</sup>           | 10.62 <sup>c*†e*</sup>        |
|               | 7.147 – 11.48                   | 6.073 – 15.13                | 16.10 – 25.90                       | 10.68 – 15.92                      | 17.39 – 28.61                   | 9.134 – 17.61                 |
|               | 9.537                           | 9.006                        | 21.34 <sup>a*</sup>                 | 12.81 <sup>c*</sup>                | 22.56 <sup>a†d*</sup>           | 11.45 <sup>a†e†</sup>         |
|               | 7.461 – 11.32                   | 7.223 – 12.73                | 17.06 – 26.69                       | 5.142 – 16.59                      | 20.95 – 25.47                   | 6.473 – 13.38                 |
| Friedman Test | $p < 0.001$                     | $p < 0.001$                  | $p < 0.001$                         | $p < 0.001$                        | $p < 0.001$                     | $p < 0.001$                   |
| Wilcoxon Test | 0 – 2...24 <sup>†</sup>         | 0 – 2...18 <sup>†</sup>      | 0 – 2...18 <sup>†</sup>             | 0 – 2...24 <sup>†</sup>            | 0 – 2...18 <sup>†</sup>         | 0 – 2...24 <sup>†</sup>       |
|               | 2 – 6...12, 16, 22 <sup>*</sup> | 0 – 20...24 <sup>*</sup>     | 0 – 20...24 <sup>*</sup>            | 2 – 8, 20 <sup>*</sup>             | 0 – 20...24 <sup>*</sup>        | 2 – 14, 18...22 <sup>†</sup>  |
|               | 2 – 14, 18, 24 <sup>†</sup>     | 2 – 16, 20, 22 <sup>*</sup>  | 2 – 6, 8, 14...18 <sup>†</sup>      | 2 – 12...22 <sup>†</sup>           | 2 – 4, 10, 20...24 <sup>*</sup> | 2 – 24 <sup>*</sup>           |
|               | 4 – 14, 22 <sup>*</sup>         | 2 – 18 <sup>†</sup>          | 2 – 10, 20...24 <sup>*</sup>        | 4 – 8, 12, 14, 22, 24 <sup>†</sup> | 2 – 6, 8, 12...18 <sup>†</sup>  | 4 – 14, 18, 24 <sup>*</sup>   |
|               | 4 – 24 <sup>†</sup>             | 4 – 24 <sup>*</sup>          | 4 – 6, 16, 18 <sup>†</sup>          | 4 – 10, 16...20 <sup>*</sup>       | 4 – 16 <sup>†</sup>             | 4 – 20, 22 <sup>†</sup>       |
|               | 6 – 14, 22, 24 <sup>*</sup>     | 6 – 22, 24 <sup>*</sup>      | 4 – 8, 10, 14, 20...24 <sup>*</sup> | 6 – 8, 12...22 <sup>†</sup>        | 4 – 18...24 <sup>*</sup>        | 6 – 8, 12, 16 <sup>*</sup>    |
|               | 10 – 14 <sup>*</sup>            | 8 – 22, 24 <sup>*</sup>      | 6 – 20...24 <sup>*</sup>            | 6 – 10, 24 <sup>*</sup>            | 6 – 8, 14, 20...24 <sup>*</sup> | 6 – 14, 18...24 <sup>†</sup>  |
|               | 12 – 14 <sup>*</sup>            | 10 – 22, 24 <sup>*</sup>     | 8 – 12 <sup>†</sup>                 | 8 – 14 <sup>*</sup>                | 6 – 12, 16, 18 <sup>†</sup>     | 8 – 10, 14, 24 <sup>*</sup>   |
|               | 14 – 16 <sup>*</sup>            | 12 – 14, 22, 24 <sup>*</sup> | 10 – 20...24 <sup>*</sup>           | 10 – 14 <sup>†</sup>               | 8 – 16 <sup>†</sup>             | 8 – 18...22 <sup>†</sup>      |
|               |                                 |                              | 12 – 18...24 <sup>*</sup>           | 10 – 22 <sup>*</sup>               | 8 – 18...24 <sup>*</sup>        | 10 – 14, 18...24 <sup>†</sup> |
|               |                                 |                              | 14 – 18...24 <sup>*</sup>           | 12 – 18 <sup>*</sup>               | 10 – 16 <sup>†</sup>            | 10 – 16 <sup>*</sup>          |
|               |                                 |                              | 16 – 20...24 <sup>*</sup>           | 14 – 18 <sup>†</sup>               | 10 – 20...24 <sup>*</sup>       | 12 – 20 <sup>†</sup>          |
|               |                                 |                              | 18 – 24 <sup>*</sup>                | 18 – 22 <sup>*</sup>               | 12 – 16 <sup>†</sup>            | 12 – 22 <sup>*</sup>          |
|               |                                 |                              | 20 – 22, 24 <sup>*</sup>            |                                    | 12 – 18...24 <sup>*</sup>       | 16 – 20 <sup>*</sup>          |
|               |                                 |                              |                                     |                                    | 14 – 16 <sup>*</sup>            |                               |
|               |                                 |                              |                                     |                                    | 16 – 18 <sup>*</sup>            |                               |
|               |                                 |                              |                                     |                                    | 18 – 20...24 <sup>*</sup>       |                               |

The animals were treated with cadmium (Cd) in the diet at the concentration of 0, 1, or 5 mg/kg (Control, Cd<sub>1</sub>, and Cd<sub>5</sub> groups) and/or 0.1% extract from the berries of *Aronia melanocarpa* L. (AM, Cd<sub>1</sub>+AM, and Cd<sub>5</sub>+AM groups) for 24 months. Data are shown as a median and minimum and maximum values for eight animals (except for seven females in the AE, Cd<sub>1</sub>, and Cd<sub>5</sub> groups after 20, 22, and 24 months). Statistically significant differences (Kruskal–Wallis test) compared to: a—Control group; b—AM group; c—Cd<sub>1</sub> group; d—Cd<sub>1</sub>+AM group; and e—Cd<sub>5</sub> group. Wilcoxon test was performed to compare data between particular two time points in the same animals during the 24-month study. \*  $p < 0.05$ , †  $p < 0.01$ , and ‡  $p < 0.001$ .

**Table S8.** The concentration of total protein (PCR) in the urine of female rats evaluated every other month during the 24-month study.

| Months        | Control                                                                                                                                                                                                                               | AM                                                                                                                                                                                                             | Cd <sub>1</sub>                                                                                                                                                                                                                                                                                                                   | Cd <sub>1</sub> +AM                                                                                                                                                                                                                            | Cd <sub>5</sub>                                                                                                                                                                                                                                                                                                                                                                                                 | Cd <sub>5</sub> +AM                                                                                                                                                                                                                                                                                                         |
|---------------|---------------------------------------------------------------------------------------------------------------------------------------------------------------------------------------------------------------------------------------|----------------------------------------------------------------------------------------------------------------------------------------------------------------------------------------------------------------|-----------------------------------------------------------------------------------------------------------------------------------------------------------------------------------------------------------------------------------------------------------------------------------------------------------------------------------|------------------------------------------------------------------------------------------------------------------------------------------------------------------------------------------------------------------------------------------------|-----------------------------------------------------------------------------------------------------------------------------------------------------------------------------------------------------------------------------------------------------------------------------------------------------------------------------------------------------------------------------------------------------------------|-----------------------------------------------------------------------------------------------------------------------------------------------------------------------------------------------------------------------------------------------------------------------------------------------------------------------------|
| 0             | 3.457                                                                                                                                                                                                                                 | 3.464                                                                                                                                                                                                          | 3.706                                                                                                                                                                                                                                                                                                                             | 3.451                                                                                                                                                                                                                                          | 3.755                                                                                                                                                                                                                                                                                                                                                                                                           | 3.566                                                                                                                                                                                                                                                                                                                       |
|               | 2.996 – 5.897                                                                                                                                                                                                                         | 2.669 – 4.770                                                                                                                                                                                                  | 2.758 – 4.726                                                                                                                                                                                                                                                                                                                     | 2.990 – 4.726                                                                                                                                                                                                                                  | 2.332 – 4.628                                                                                                                                                                                                                                                                                                                                                                                                   | 2.700 – 4.503                                                                                                                                                                                                                                                                                                               |
| 2             | 7.575                                                                                                                                                                                                                                 | 7.323                                                                                                                                                                                                          | 10.26                                                                                                                                                                                                                                                                                                                             | 8.623                                                                                                                                                                                                                                          | 7.220                                                                                                                                                                                                                                                                                                                                                                                                           | 6.941                                                                                                                                                                                                                                                                                                                       |
|               | 6.200 – 15.96                                                                                                                                                                                                                         | 4.653 – 39.63                                                                                                                                                                                                  | 8.190 – 22.09                                                                                                                                                                                                                                                                                                                     | 6.308 – 24.71                                                                                                                                                                                                                                  | 3.381 – 18.31                                                                                                                                                                                                                                                                                                                                                                                                   | 1.722 – 15.99                                                                                                                                                                                                                                                                                                               |
| 4             | 9.005                                                                                                                                                                                                                                 | 5.190                                                                                                                                                                                                          | 10.24                                                                                                                                                                                                                                                                                                                             | 8.347                                                                                                                                                                                                                                          | 23.01 <sup>b*</sup>                                                                                                                                                                                                                                                                                                                                                                                             | 10.86                                                                                                                                                                                                                                                                                                                       |
|               | 4.391 – 18.96                                                                                                                                                                                                                         | 3.104 – 20.35                                                                                                                                                                                                  | 3.055 – 26.13                                                                                                                                                                                                                                                                                                                     | 2.687 – 10.90                                                                                                                                                                                                                                  | 4.868 – 33.42                                                                                                                                                                                                                                                                                                                                                                                                   | 5.875 – 27.12                                                                                                                                                                                                                                                                                                               |
| 6             | 6.932                                                                                                                                                                                                                                 | 9.714                                                                                                                                                                                                          | 22.46 <sup>a†</sup>                                                                                                                                                                                                                                                                                                               | 7.557 <sup>c*</sup>                                                                                                                                                                                                                            | 15.79 <sup>a*</sup>                                                                                                                                                                                                                                                                                                                                                                                             | 8.794                                                                                                                                                                                                                                                                                                                       |
|               | 3.107 – 10.56                                                                                                                                                                                                                         | 1.963 – 13.50                                                                                                                                                                                                  | 8.580 – 27.85                                                                                                                                                                                                                                                                                                                     | 4.416 – 16.33                                                                                                                                                                                                                                  | 7.045 – 20.35                                                                                                                                                                                                                                                                                                                                                                                                   | 3.129 – 26.57                                                                                                                                                                                                                                                                                                               |
| 8             | 9.280                                                                                                                                                                                                                                 | 10.21                                                                                                                                                                                                          | 45.34 <sup>a*</sup>                                                                                                                                                                                                                                                                                                               | 10.22 <sup>c*</sup>                                                                                                                                                                                                                            | 32.94 <sup>a*</sup>                                                                                                                                                                                                                                                                                                                                                                                             | 3.559 <sup>ct‡</sup>                                                                                                                                                                                                                                                                                                        |
|               | 4.227 – 15.12                                                                                                                                                                                                                         | 3.034 – 32.08                                                                                                                                                                                                  | 29.34 – 78.80                                                                                                                                                                                                                                                                                                                     | 4.046 – 20.79                                                                                                                                                                                                                                  | 30.01 – 48.38                                                                                                                                                                                                                                                                                                                                                                                                   | 2.689 – 5.184                                                                                                                                                                                                                                                                                                               |
| 10            | 12.55                                                                                                                                                                                                                                 | 8.712                                                                                                                                                                                                          | 38.32 <sup>a*b†</sup>                                                                                                                                                                                                                                                                                                             | 14.34 <sup>c*</sup>                                                                                                                                                                                                                            | 35.72 <sup>a*b†</sup>                                                                                                                                                                                                                                                                                                                                                                                           | 13.15 <sup>c*‡</sup>                                                                                                                                                                                                                                                                                                        |
|               | 6.768 – 16.56                                                                                                                                                                                                                         | 6.096 – 12.14                                                                                                                                                                                                  | 26.16 – 59.32                                                                                                                                                                                                                                                                                                                     | 8.064 – 18.96                                                                                                                                                                                                                                  | 28.80 – 43.36                                                                                                                                                                                                                                                                                                                                                                                                   | 7.680 – 18.96                                                                                                                                                                                                                                                                                                               |
| 12            | 10.80                                                                                                                                                                                                                                 | 6.435                                                                                                                                                                                                          | 45.42 <sup>a*b†</sup>                                                                                                                                                                                                                                                                                                             | 11.07 <sup>c*</sup>                                                                                                                                                                                                                            | 46.10 <sup>a*b†</sup>                                                                                                                                                                                                                                                                                                                                                                                           | 5.385 <sup>ct‡</sup>                                                                                                                                                                                                                                                                                                        |
|               | 6.272 – 12.28                                                                                                                                                                                                                         | 4.206 – 12.68                                                                                                                                                                                                  | 39.28 – 68.00                                                                                                                                                                                                                                                                                                                     | 8.240 – 15.44                                                                                                                                                                                                                                  | 38.44 – 57.68                                                                                                                                                                                                                                                                                                                                                                                                   | 2.614 – 7.626                                                                                                                                                                                                                                                                                                               |
| 14            | 10.46                                                                                                                                                                                                                                 | 7.500                                                                                                                                                                                                          | 44.82 <sup>a*b†</sup>                                                                                                                                                                                                                                                                                                             | 11.82 <sup>c*</sup>                                                                                                                                                                                                                            | 49.72 <sup>a*b†</sup>                                                                                                                                                                                                                                                                                                                                                                                           | 6.280 <sup>ct‡</sup>                                                                                                                                                                                                                                                                                                        |
|               | 8.040 – 11.20                                                                                                                                                                                                                         | 4.560 – 11.04                                                                                                                                                                                                  | 38.96 – 51.52                                                                                                                                                                                                                                                                                                                     | 5.760 – 14.36                                                                                                                                                                                                                                  | 37.40 – 64.12                                                                                                                                                                                                                                                                                                                                                                                                   | 4.080 – 9.200                                                                                                                                                                                                                                                                                                               |
| 16            | 11.30                                                                                                                                                                                                                                 | 9.900                                                                                                                                                                                                          | 43.44 <sup>a*b†</sup>                                                                                                                                                                                                                                                                                                             | 11.27 <sup>c*</sup>                                                                                                                                                                                                                            | 51.08 <sup>a*b†d†</sup>                                                                                                                                                                                                                                                                                                                                                                                         | 10.71 <sup>c*‡</sup>                                                                                                                                                                                                                                                                                                        |
|               | 6.660 – 16.16                                                                                                                                                                                                                         | 5.720 – 12.00                                                                                                                                                                                                  | 37.12 – 52.60                                                                                                                                                                                                                                                                                                                     | 4.730 – 14.69                                                                                                                                                                                                                                  | 36.00 – 67.57                                                                                                                                                                                                                                                                                                                                                                                                   | 6.943 – 14.40                                                                                                                                                                                                                                                                                                               |
| 18            | 12.32                                                                                                                                                                                                                                 | 11.68                                                                                                                                                                                                          | 51.60 <sup>a*b†</sup>                                                                                                                                                                                                                                                                                                             | 11.98 <sup>c*</sup>                                                                                                                                                                                                                            | 55.83 <sup>a*b†d*</sup>                                                                                                                                                                                                                                                                                                                                                                                         | 11.48 <sup>ct‡</sup>                                                                                                                                                                                                                                                                                                        |
|               | 8.680 – 16.36                                                                                                                                                                                                                         | 6.560 – 15.48                                                                                                                                                                                                  | 36.96 – 87.12                                                                                                                                                                                                                                                                                                                     | 9.440 – 16.20                                                                                                                                                                                                                                  | 43.04 – 67.20                                                                                                                                                                                                                                                                                                                                                                                                   | 4.320 – 14.80                                                                                                                                                                                                                                                                                                               |
| 20            | 11.76                                                                                                                                                                                                                                 | 14.20                                                                                                                                                                                                          | 42.96 <sup>a*</sup>                                                                                                                                                                                                                                                                                                               | 11.14 <sup>c*</sup>                                                                                                                                                                                                                            | 57.22 <sup>a*b†d†</sup>                                                                                                                                                                                                                                                                                                                                                                                         | 11.46 <sup>c*‡</sup>                                                                                                                                                                                                                                                                                                        |
|               | 8.120 – 16.28                                                                                                                                                                                                                         | 8.760 – 16.40                                                                                                                                                                                                  | 38.05 – 81.64                                                                                                                                                                                                                                                                                                                     | 10.44 – 16.20                                                                                                                                                                                                                                  | 42.96 – 66.32                                                                                                                                                                                                                                                                                                                                                                                                   | 5.880 – 19.56                                                                                                                                                                                                                                                                                                               |
| 22            | 11.48                                                                                                                                                                                                                                 | 12.20                                                                                                                                                                                                          | 60.36 <sup>a*</sup>                                                                                                                                                                                                                                                                                                               | 11.22 <sup>c*</sup>                                                                                                                                                                                                                            | 57.62 <sup>a*d†</sup>                                                                                                                                                                                                                                                                                                                                                                                           | 10.36 <sup>ct‡</sup>                                                                                                                                                                                                                                                                                                        |
|               | 9.560 – 16.56                                                                                                                                                                                                                         | 10.92 – 16.60                                                                                                                                                                                                  | 36.65 – 82.76                                                                                                                                                                                                                                                                                                                     | 9.160 – 13.92                                                                                                                                                                                                                                  | 47.96 – 72.76                                                                                                                                                                                                                                                                                                                                                                                                   | 6.920 – 14.14                                                                                                                                                                                                                                                                                                               |
| 24            | 11.29                                                                                                                                                                                                                                 | 11.68                                                                                                                                                                                                          | 64.28 <sup>a*</sup>                                                                                                                                                                                                                                                                                                               | 8.986 <sup>ct</sup>                                                                                                                                                                                                                            | 63.09 <sup>a*d†</sup>                                                                                                                                                                                                                                                                                                                                                                                           | 10.71 <sup>ct‡</sup>                                                                                                                                                                                                                                                                                                        |
|               | 8.320 – 12.56                                                                                                                                                                                                                         | 10.36 – 20.00                                                                                                                                                                                                  | 56.08 – 82.50                                                                                                                                                                                                                                                                                                                     | 4.179 – 13.28                                                                                                                                                                                                                                  | 55.44 – 79.04                                                                                                                                                                                                                                                                                                                                                                                                   | 8.080 – 14.72                                                                                                                                                                                                                                                                                                               |
| Friedman Test | $p < 0.001$                                                                                                                                                                                                                           | $p < 0.001$                                                                                                                                                                                                    | $p < 0.001$                                                                                                                                                                                                                                                                                                                       | $p < 0.001$                                                                                                                                                                                                                                    | $p < 0.001$                                                                                                                                                                                                                                                                                                                                                                                                     | $p < 0.001$                                                                                                                                                                                                                                                                                                                 |
| Wilcoxon Test | 0 – 2, 6...24 <sup>†</sup><br>2 – 4 <sup>*</sup><br>2 – 10 <sup>†</sup><br>2 – 18 <sup>*</sup><br>6 – 10...20 <sup>*</sup><br>6 – 22, 24 <sup>†</sup><br>8 – 10 <sup>†</sup><br>14 – 18, 22 <sup>*</sup><br>16 – 18...24 <sup>*</sup> | 0 – 2, 10...18 <sup>†</sup><br>0 – 4, 6, 8, 20...24 <sup>*</sup><br>10 – 22, 24 <sup>*</sup><br>12 – 18, 22, 24 <sup>*</sup><br>14 – 18...24 <sup>*</sup><br>16 – 18 <sup>†</sup><br>16 – 22...24 <sup>*</sup> | 0 – 2, 6...18 <sup>†</sup><br>0 – 4, 20...24 <sup>*</sup><br>2 – 8 <sup>†</sup><br>2 – 20...24 <sup>*</sup><br>4 – 6, 20...24 <sup>*</sup><br>4 – 8...18 <sup>†</sup><br>6 – 20...24 <sup>*</sup><br>10 – 24 <sup>*</sup><br>12 – 24 <sup>*</sup><br>14 – 22, 24 <sup>*</sup><br>16 – 22, 24 <sup>*</sup><br>22 – 24 <sup>*</sup> | 0 – 2, 8...24 <sup>†</sup><br>0 – 4, 6 <sup>*</sup><br>4 – 10, 14 <sup>†</sup><br>4 – 10, 16...20 <sup>*</sup><br>4 – 12, 18...22 <sup>*</sup><br>16 – 18 <sup>*</sup><br>18 – 24 <sup>*</sup><br>20 – 24 <sup>*</sup><br>22 – 24 <sup>†</sup> | 0 – 2, 20...24 <sup>*</sup><br>0 – 4...18 <sup>†</sup><br>2 – 4, 20, 24 <sup>*</sup><br>2 – 8...18 <sup>†</sup><br>4 – 8, 20...24 <sup>*</sup><br>4 – 10...18 <sup>†</sup><br>6 – 8...18 <sup>†</sup><br>6 – 20...24 <sup>*</sup><br>8 – 12...18 <sup>†</sup><br>8 – 14, 16, 20...24 <sup>*</sup><br>10 – 12...18 <sup>†</sup><br>10 – 20...24 <sup>*</sup><br>12 – 18 <sup>†</sup><br>12 – 22, 24 <sup>*</sup> | 0 – 2 <sup>*</sup><br>0 – 4, 6, 10, 14...24 <sup>†</sup><br>2 – 8 <sup>*</sup><br>4 – 8 <sup>†</sup><br>4 – 12, 14 <sup>*</sup><br>6 – 8 <sup>*</sup><br>8 – 10, 14...24 <sup>†</sup><br>10 – 12 <sup>†</sup><br>10 – 14 <sup>*</sup><br>12 – 16...24 <sup>†</sup><br>14 – 16, 18 <sup>*</sup><br>14 – 20...24 <sup>†</sup> |

The animals were treated with cadmium (Cd) in the diet at the concentration of 0, 1, or 5 mg/kg (Control, Cd<sub>1</sub>, and Cd<sub>5</sub> groups) and/or 0.1% extract from the berries of *Aronia melanocarpa* L. (AM, Cd<sub>1</sub>+AM, and Cd<sub>5</sub>+AM groups) for 24 months. Data are shown as a median and minimum and maximum values for eight animals (except for seven females in the AE, Cd<sub>1</sub>, and Cd<sub>5</sub> groups after 20, 22, and 24 months). Statistically significant differences (Kruskal–Wallis test) compared to: a—Control group; b—AM group; c—Cd<sub>1</sub> group; d—Cd<sub>1</sub>+AM group; and e—Cd<sub>5</sub> group. Wilcoxon test was performed to compare data between particular two time points in the same animals during the 24-month study. \*  $p < 0.05$ , †  $p < 0.01$ , and ‡  $p < 0.001$ .



**Table S9.** The concentration of creatinine in the serum and urine and creatinine clearance in female rats.

| Group                                      | Experiment Duration                     |                        |                                         |                                         |
|--------------------------------------------|-----------------------------------------|------------------------|-----------------------------------------|-----------------------------------------|
|                                            | 3 Months                                | 10 Months              | 17 Months                               | 24 Months                               |
| <b>Creatinine in the Serum (mg/100 mL)</b> |                                         |                        |                                         |                                         |
| Control                                    | 0.780<br>0.678 – 0.847                  | 0.742<br>0.645 – 0.774 | 0.648<br>0.537 – 0.806                  | 0.862<br>0.646 – 0.985                  |
| AM                                         | 0.758<br>0.678 – 0.885                  | 0.710<br>0.613 – 0.903 | 0.537<br>0.358 – 0.866                  | 0.708<br>0.554 – 0.923                  |
| Cd <sub>1</sub>                            | 0.692<br>0.615 – 0.769                  | 0.726<br>0.645 – 0.839 | 0.761<br>0.478 – 1.134                  | 1.015<br>0.646 – 1.108                  |
| Cd <sub>1</sub> +AM                        | 0.769<br>0.731 – 0.846                  | 0.807<br>0.704 – 0.936 | 0.552<br>0.418 – 0.866                  | 0.708<br>0.677 – 1.262                  |
| Cd <sub>5</sub>                            | 0.750 <sup>b† d†</sup><br>0.654 – 0.885 | 0.874<br>0.667 – 1.412 | 0.885<br>0.537 – 1.060                  | 1.126 <sup>b† d*</sup><br>0.973 – 1.277 |
| Cd <sub>5</sub> +AM                        | 0.556 <sup>a† e†</sup><br>0.540 – 0.667 | 0.784<br>0.745 – 0.902 | 0.619 <sup>e†</sup><br>0.358 – 0.716    | 0.687 <sup>c* e†</sup><br>0.523 – 0.800 |
| <b>Creatinine in the Urine (mg/mL)</b>     |                                         |                        |                                         |                                         |
| Control                                    | 1.491<br>0.545 – 2.564                  | 1.046<br>0.662 – 1.339 | 0.941<br>0.484 – 5.210                  | 0.703<br>0.348 – 2.754                  |
| AM                                         | 1.391<br>0.764 – 2.364                  | 0.709<br>0.554 – 1.077 | 0.637<br>0.274 – 2.081                  | 0.596<br>0.422 – 1.032                  |
| Cd <sub>1</sub>                            | 1.121<br>0.420 – 1.677                  | 0.928<br>0.652 – 1.464 | 1.070<br>0.404 – 4.404                  | 0.816<br>0.438 – 1.219                  |
| Cd <sub>1</sub> +AM                        | 0.779<br>0.435 – 1.516                  | 0.900<br>0.371 – 3.757 | 0.720<br>0.229 – 1.421                  | 0.891<br>0.469 – 2.047                  |
| Cd <sub>5</sub>                            | 0.976<br>0.516 – 1.500                  | 0.923<br>0.592 – 2.197 | 0.617<br>0.325 – 0.983                  | 0.737<br>0.272 – 0.951                  |
| Cd <sub>5</sub> +AM                        | 1.260<br>0.796 – 1.944                  | 0.675<br>0.282 – 2.169 | 0.667<br>0.500 – 1.400                  | 0.726<br>0.418 – 1.508                  |
| <b>Creatinine Clearance (mL/min)</b>       |                                         |                        |                                         |                                         |
| Control                                    | 1.346<br>1.015 – 1.592                  | 1.060<br>0.832 – 1.538 | 0.949<br>0.505 – 1.001                  | 0.984<br>0.820 – 1.203                  |
| AM                                         | 1.208<br>0.652 – 1.484                  | 0.927<br>0.852 – 1.464 | 0.909<br>0.610 – 1.519                  | 0.931<br>0.725 – 1.259                  |
| Cd <sub>1</sub>                            | 1.289<br>0.757 – 2.987                  | 0.943<br>0.799 – 1.292 | 0.950<br>0.410 – 1.476                  | 0.982<br>0.847 – 1.036                  |
| Cd <sub>1</sub> +AM                        | 1.117<br>0.769 – 1.863                  | 0.967<br>0.604 – 1.616 | 1.030<br>0.736 – 1.813                  | 1.306<br>0.519 – 1.693                  |
| Cd <sub>5</sub>                            | 1.203<br>0.960 – 2.348                  | 0.988<br>0.732 – 1.711 | 0.613 <sup>a† d†</sup><br>0.374 – 0.799 | 0.764 <sup>a†</sup><br>0.425 – 0.798    |
| Cd <sub>5</sub> +AM                        | 1.205<br>0.798 – 1.829                  | 1.095<br>0.874 – 1.277 | 0.860 <sup>e*</sup><br>0.625 – 1.357    | 1.582 <sup>e†</sup><br>0.785 – 2.034    |

The animals were treated with cadmium (Cd) in the diet at the concentration of 0, 1, or 5 mg/kg (Control, Cd<sub>1</sub>, and Cd<sub>5</sub> groups) and/or 0.1% extract from the berries of *Aronia melanocarpa* L. (AM, Cd<sub>1</sub>+AM, and Cd<sub>5</sub>+AM groups) for 3, 10, 17, and 24 months. Data are shown as a median and minimum and maximum values for eight animals (except for seven females in the AM, Cd<sub>1</sub>, and Cd<sub>5</sub> groups after 24 months). Statistically significant differences (Kruskal–Wallis test) compared to: a—Control group; b—AM group; c—Cd<sub>1</sub> group; d—Cd<sub>1</sub>+AM group; and e—Cd<sub>5</sub> group, where \*  $p < 0.05$ , †  $p < 0.01$ , and ‡  $p < 0.001$ , are marked.

**Table S10.** The concentration of urea and uric acid in the serum of female rats.

| Group                 | Experiment Duration                                |                        |                                                                  |                                                                  |
|-----------------------|----------------------------------------------------|------------------------|------------------------------------------------------------------|------------------------------------------------------------------|
|                       | 3 Months                                           | 10 Months              | 17 Months                                                        | 24 Months                                                        |
| Uric Acid (mg/100 mL) |                                                    |                        |                                                                  |                                                                  |
| Control               | 3.110<br>2.680 – 3.630                             | 2.360<br>2.000 – 2.680 | 3.840<br>3.440 – 4.690                                           | 3.380<br>3.310 – 4.900                                           |
| AM                    | 3.315<br>2.950 – 3.630                             | 2.540<br>2.100 – 3.050 | 3.970<br>3.590 – 4.940                                           | 3.200<br>2.950 – 4.500                                           |
| Cd <sub>1</sub>       | 4.340 <sup>a†</sup> <sup>bt</sup><br>4.020 – 4.630 | 2.440<br>2.120 – 2.520 | 3.640<br>3.000 – 4.030                                           | 3.450<br>3.160 – 4.430                                           |
| Cd <sub>1</sub> +AM   | 4.210 <sup>a†</sup> <sup>bt</sup><br>3.680 – 5.370 | 2.460<br>2.260 – 2.700 | 4.414<br>3.310 – 4.630                                           | 3.750<br>3.200 – 4.800                                           |
| Cd <sub>5</sub>       | 3.380 <sup>c*</sup> <sup>d*</sup><br>3.150 – 3.590 | 2.750<br>2.350 – 3.430 | 4.140<br>3.160 – 4.750                                           | 4.400 <sup>a*</sup> <sup>bt</sup><br>3.500 – 7.500               |
| Cd <sub>5</sub> +AM   | 3.420<br>3.200 – 4.000                             | 2.550<br>2.260 – 2.770 | 4.060<br>3.530 – 4.840                                           | 3.700<br>3.100 – 5.500                                           |
| Urea (mg/100 mL)      |                                                    |                        |                                                                  |                                                                  |
| Control               | 26.30<br>20.18 – 32.40                             | 32.54<br>10.09 – 44.40 | 28.26<br>23.28 – 35.80                                           | 24.57<br>17.24 – 33.62                                           |
| AM                    | 23.47<br>16.20 – 30.75                             | 40.52<br>15.95 – 52.16 | 24.56<br>19.40 – 31.90                                           | 17.24<br>11.20 – 40.00                                           |
| Cd <sub>1</sub>       | 37.22<br>26.29 – 47.88                             | 26.51<br>20.26 – 38.79 | 26.79<br>24.60 – 33.20                                           | 38.02<br>34.90 – 48.90                                           |
| Cd <sub>1</sub> +AM   | 38.38 <sup>b*</sup><br>10.61 – 47.18               | 38.80<br>4.810 – 49.57 | 34.50<br>16.80 – 40.80                                           | 21.88<br>18.75 – 25.86                                           |
| Cd <sub>5</sub>       | 32.16<br>14.32 – 42.72                             | 40.73<br>29.31 – 52.58 | 37.87 <sup>a*</sup> <sup>bt</sup> <sup>c*</sup><br>31.40 – 46.55 | 53.62 <sup>a*</sup> <sup>bt</sup> <sup>d†</sup><br>41.14 – 79.16 |
| Cd <sub>5</sub> +AM   | 21.92 <sup>c*</sup> <sup>d†</sup><br>13.85 – 26.06 | 35.35<br>4.810 – 42.67 | 32.35<br>21.40 – 38.90                                           | 20.10 <sup>c*</sup> <sup>e†</sup><br>17.71 – 34.04               |

The animals were treated with cadmium (Cd) in the diet at the concentration of 0, 1, or 5 mg/kg (Control, Cd<sub>1</sub>, and Cd<sub>5</sub> groups) and/or 0.1% extract from the berries of *Aronia melanocarpa* L. (AM, Cd<sub>1</sub>+AM, and Cd<sub>5</sub>+AM groups) for 3, 10, 17, and 24 months. Data are shown as a median and minimum and maximum values for eight animals (except for seven females in the AM, Cd<sub>1</sub>, and Cd<sub>5</sub> groups after 24 months). Statistically significant differences (Kruskal–Wallis test) compared to: a—Control group; b—AM group; c—Cd<sub>1</sub> group; d—Cd<sub>1</sub>+AM group; and e—Cd<sub>5</sub> group, where \*  $p < 0.05$ , <sup>†</sup>  $p < 0.01$ , and <sup>‡</sup>  $p < 0.001$ , are marked.

**Table S11.** The concentrations of urea and uric acid in the urine of female rats.

| Group               | Experiment Duration |               |               |               |
|---------------------|---------------------|---------------|---------------|---------------|
|                     | 3 Months            | 10 Months     | 17 Months     | 24 Months     |
| Uric Acid (mg/24 h) |                     |               |               |               |
| Control             | 21.43               | 23.85         | 18.01         | 33.99         |
|                     | 12.42 – 44.00       | 14.80 – 32.27 | 16.52 – 24.60 | 18.71 – 76.35 |
| AM                  | 20.22               | 35.77         | 24.20         | 39.24         |
|                     | 8.300 – 35.85       | 28.35 – 47.88 | 3.860 – 39.16 | 9.650 – 68.88 |
| Cd <sub>1</sub>     | 31.02               | 26.25         | 32.35         | 21.96         |
|                     | 12.73 – 71.10       | 17.40 – 35.91 | 3.200 – 41.50 | 13.89 – 42.39 |
| Cd <sub>1</sub> +AM | 29.32               | 23.52         | 35.95         | 28.68         |
|                     | 26.25 – 48.43       | 12.28 – 41.21 | 11.77 – 66.41 | 8.253 – 51.99 |
| Cd <sub>5</sub>     | 35.21               | 21.88         | 32.68         | 27.37         |
|                     | 24.5558.56          | 14.61 – 48.20 | 14.18 – 52.44 | 19.86 – 31.26 |
| Cd <sub>5</sub> +AM | 26.72               | 26.38         | 27.86         | 34.12         |
|                     | 15.63 – 39.84       | 10.56 – 77.53 | 9.510 – 47.76 | 22.53 – 37.97 |
| Urea (mg/24 h)      |                     |               |               |               |
| Control             | 41.85               | 35.03         | 57.52         | 36.93         |
|                     | 18.60 – 72.00       | 22.80 – 43.40 | 29.52 – 68.58 | 21.82 – 74.82 |
| AM                  | 40.12               | 47.80         | 43.55         | 43.16         |
|                     | 19.25 – 50.25       | 26.95 – 81.90 | 24.00 – 69.50 | 13.29 – 83.44 |
| Cd <sub>1</sub>     | 51.30               | 31.32         | 57.37         | 39.46         |
|                     | 16.75 – 99.00       | 22.40 – 37.80 | 22.06 – 86.40 | 24.27 – 64.94 |
| Cd <sub>1</sub> +AM | 58.10               | 34.69         | 42.17         | 59.65         |
|                     | 24.60 – 86.40       | 16.70 – 56.64 | 22.13 – 72.73 | 14.76 – 82.61 |
| Cd <sub>5</sub>     | 50.38               | 36.96         | 53.96         | 41.76         |
|                     | 33.50 – 81.60       | 17.10 – 53.80 | 38.97 – 92.42 | 33.58 – 72.85 |
| Cd <sub>5</sub> +AM | 42.95               | 43.67         | 43.67         | 51.27         |
|                     | 20.00 – 52.20       | 22.89 – 56.52 | 23.52 – 70.04 | 26.52 – 100.1 |

The animals were treated with cadmium (Cd) in the diet at the concentration of 0, 1, or 5 mg/kg (Control, Cd<sub>1</sub>, and Cd<sub>5</sub> groups) and/or 0.1% extract from the berries of *Aronia melanocarpa* L. (AM, Cd<sub>1</sub>+AM, and Cd<sub>5</sub>+AM group) for 3, 10, 17, and 24 months. Data are shown as a median and minimum and maximum values for eight animals (except for seven females in the AM, Cd<sub>1</sub>, and Cd<sub>5</sub> groups after 24 months). There were no statistically significant differences (Kruskal–Wallis test) between the experimental groups.

**Table S12.** The concentration of cadmium (Cd) in the urine of female rats evaluated every other month during the 24-month study.

| Months        | Control         | AM                                                                                    | Cd <sub>1</sub>      | Cd <sub>1</sub> +AM                                                                                                                                                                                                                                          | Cd <sub>5</sub>                                                                           | Cd <sub>5</sub> +AM                                                                                                                          |
|---------------|-----------------|---------------------------------------------------------------------------------------|----------------------|--------------------------------------------------------------------------------------------------------------------------------------------------------------------------------------------------------------------------------------------------------------|-------------------------------------------------------------------------------------------|----------------------------------------------------------------------------------------------------------------------------------------------|
| 0             | 0.1263          | 0.1157                                                                                | 0.1333               | 0.1216                                                                                                                                                                                                                                                       | 0.1170                                                                                    | 0.1323                                                                                                                                       |
|               | 0.0300 - 0.1749 | 0.0886 - 0.1764                                                                       | 0.0600 - 0.1766      | 0.0393 - 0.1794                                                                                                                                                                                                                                              | 0.0600 - 0.1794                                                                           | 0.0812 - 0.1467                                                                                                                              |
| 2             | 0.1376          | 0.1337                                                                                | 0.3024               | 0.3818 <sup>a*</sup>                                                                                                                                                                                                                                         | 0.4534 <sup>a† b*</sup>                                                                   | 0.4706 <sup>a† b†</sup>                                                                                                                      |
|               | 0.0950 - 0.2752 | 0.1040 - 0.3917                                                                       | 0.1422 - 0.3462      | 0.2790 - 0.4942                                                                                                                                                                                                                                              | 0.1664 - 0.5727                                                                           | 0.2584 - 0.6948                                                                                                                              |
| 4             | 0.1342          | 0.1259                                                                                | 0.2398               | 0.2474                                                                                                                                                                                                                                                       | 0.4378 <sup>a† b†</sup>                                                                   | 0.4733 <sup>a† b*</sup>                                                                                                                      |
|               | 0.0677 - 0.2894 | 0.1029 - 0.1570                                                                       | 0.1187 - 0.4146      | 0.1418 - 0.4231                                                                                                                                                                                                                                              | 0.2094 - 0.6720                                                                           | 0.1610 - 0.7368                                                                                                                              |
| 6             | 0.1244          | 0.1421                                                                                | 0.2311 <sup>a†</sup> | 0.2162                                                                                                                                                                                                                                                       | 0.2599 <sup>a† b† d*</sup>                                                                | 0.2392 <sup>a† b*</sup>                                                                                                                      |
|               | 0.0620 - 0.1876 | 0.1044 - 0.1908                                                                       | 0.1485 - 0.3397      | 0.1519 - 0.3184                                                                                                                                                                                                                                              | 0.2327 - 0.4169                                                                           | 0.1696 - 0.6054                                                                                                                              |
| 8             | 0.1136          | 0.1161                                                                                | 0.2481 <sup>b*</sup> | 0.2476 <sup>a* b†</sup>                                                                                                                                                                                                                                      | 0.3224 <sup>a† b†</sup>                                                                   | 0.2876 <sup>a* b†</sup>                                                                                                                      |
|               | 0.0652 - 0.1738 | 0.0646 - 0.1690                                                                       | 0.1396 - 0.4467      | 0.2125 - 0.5917                                                                                                                                                                                                                                              | 0.1862 - 0.4342                                                                           | 0.2376 - 0.3512                                                                                                                              |
| 10            | 0.1129          | 0.1439                                                                                | 0.2121               | 0.2188                                                                                                                                                                                                                                                       | 0.3570 <sup>a† b†</sup>                                                                   | 0.3957 <sup>a† b†</sup>                                                                                                                      |
|               | 0.1015 - 0.1601 | 0.1127 - 0.1605                                                                       | 0.1114 - 0.3586      | 0.1609 - 0.3720                                                                                                                                                                                                                                              | 0.2120 - 0.5084                                                                           | 0.2879 - 0.6738                                                                                                                              |
| 12            | 0.1446          | 0.1564                                                                                | 0.2403               | 0.2848 <sup>a†</sup>                                                                                                                                                                                                                                         | 0.3462 <sup>a† b*</sup>                                                                   | 0.3622 <sup>a† b*</sup>                                                                                                                      |
|               | 0.0938 - 0.1883 | 0.0833 - 0.2836                                                                       | 0.1912 - 0.4959      | 0.2256 - 0.4953                                                                                                                                                                                                                                              | 0.2024 - 0.6804                                                                           | 0.2053 - 0.4630                                                                                                                              |
| 14            | 0.1549          | 0.1996                                                                                | 0.2700               | 0.2972 <sup>a*</sup>                                                                                                                                                                                                                                         | 0.4798 <sup>a† b†</sup>                                                                   | 0.5580 <sup>a† b†</sup>                                                                                                                      |
|               | 0.0870 - 0.2560 | 0.0893 - 0.2553                                                                       | 0.1850 - 0.3110      | 0.2790 - 0.6836                                                                                                                                                                                                                                              | 0.2032 - 0.7207                                                                           | 0.2338 - 0.9776                                                                                                                              |
| 16            | 0.1634          | 0.1697                                                                                | 0.2867               | 0.3031                                                                                                                                                                                                                                                       | 0.4968 <sup>a† b*</sup>                                                                   | 0.6167 <sup>a† b† e*</sup>                                                                                                                   |
|               | 0.0683 - 0.2176 | 0.0883 - 0.3840                                                                       | 0.1255 - 0.6386      | 0.2053 - 0.9170                                                                                                                                                                                                                                              | 0.2867 - 0.9785                                                                           | 0.3414 - 0.8911                                                                                                                              |
| 18            | 0.1335          | 0.1472                                                                                | 0.2180               | 0.2256                                                                                                                                                                                                                                                       | 0.3936 <sup>a† b†</sup>                                                                   | 0.4329 <sup>a† b†</sup>                                                                                                                      |
|               | 0.1010 - 0.1829 | 0.1163 - 0.1841                                                                       | 0.1227 - 0.4043      | 0.1774 - 0.3824                                                                                                                                                                                                                                              | 0.1860 - 0.4897                                                                           | 0.2423 - 0.6143                                                                                                                              |
| 20            | 0.1310          | 0.1515                                                                                | 0.2019               | 0.2107                                                                                                                                                                                                                                                       | 0.3485 <sup>a† b†</sup>                                                                   | 0.4068 <sup>a† b† e*</sup>                                                                                                                   |
|               | 0.0906 - 0.1898 | 0.0768 - 0.2050                                                                       | 0.1704 - 0.2918      | 0.1579 - 0.3246                                                                                                                                                                                                                                              | 0.2523 - 0.4841                                                                           | 0.3272 - 0.5538                                                                                                                              |
| 22            | 0.1382          | 0.1552                                                                                | 0.2230               | 0.3061 <sup>a† b*</sup>                                                                                                                                                                                                                                      | 0.3345 <sup>a† b*</sup>                                                                   | 0.4859 <sup>a† b† e*</sup>                                                                                                                   |
|               | 0.1217 - 0.2770 | 0.1251 - 0.2168                                                                       | 0.1565 - 0.2864      | 0.2584 - 0.4623                                                                                                                                                                                                                                              | 0.2034 - 0.4645                                                                           | 0.3927 - 0.8177                                                                                                                              |
| 24            | 0.1374          | 0.1304                                                                                | 0.1958               | 0.2050                                                                                                                                                                                                                                                       | 0.4206 <sup>a† b†</sup>                                                                   | 0.4927 <sup>a† b† e*</sup>                                                                                                                   |
|               | 0.0764 - 0.1937 | 0.1118 - 0.1618                                                                       | 0.1795 - 0.2451      | 0.1794 - 0.2531                                                                                                                                                                                                                                              | 0.3110 - 0.4695                                                                           | 0.4308 - 0.6616                                                                                                                              |
| Friedman Test | $p = 0.790$     | $p < 0.05$                                                                            | $p = 0.063$          | $p < 0.001$                                                                                                                                                                                                                                                  | $p < 0.001$                                                                               | $p < 0.001$                                                                                                                                  |
| Wilcoxon Test |                 | 2 - 8 *<br>4 - 22 *<br>6 - 8 *<br>8 - 10, 14...18, 22, 24 *<br>10 - 22 †<br>12 - 24 * |                      | 0 - 2, 8...18, 22, 24 †<br>0 - 4, 6, 20 *<br>2 - 4, 18, 22 *<br>2 - 6, 10, 20, 24 †<br>6 - 14 *<br>6 - 22 †<br>8 - 24 *<br>10 - 14 †<br>10 - 16, 22 *<br>12 - 20, 24 *<br>14 - 18 *<br>14 - 20, 24 †<br>16 - 20, 24 *<br>18 - 22 *<br>20 - 22 *<br>22 - 24 † | 0 - 2...18 †<br>0 - 20...24 *<br>2 - 6 *<br>6 - 14, 16, 20, 24 *<br>8 - 24 *<br>20 - 24 * | 0 - 2...24 †<br>2 - 6, 8 *<br>4 - 6 *<br>6 - 14, 24 *<br>6 - 16 †<br>8 - 10, 14, 18...22 *<br>8 - 16, 24 †<br>12 - 14, 16, 24 *<br>16 - 20 * |

The animals were treated with cadmium (Cd) in the diet at the concentration of 0, 1, or 5 mg/kg (Control, Cd<sub>1</sub>, and Cd<sub>5</sub> groups) and/or 0.1% extract from the berries of *Aronia melanocarpa* L. (AM, Cd<sub>1</sub>+AM, and Cd<sub>5</sub>+AM groups) for 24 months. Data are shown as a median and minimum and maximum values for eight animals (except for seven females in the AE, Cd<sub>1</sub>, and Cd<sub>5</sub> groups after 20, 22, and 24 months). Statistically significant differences (Kruskal-Wallis test) compared to: a—Control group; b—AM group; c—Cd<sub>1</sub> group; d—Cd<sub>1</sub>+AM group; and e—Cd<sub>5</sub> group. Wilcoxon test was performed to compare data between particular two time points in the same animals during the 24-month study. \*  $p < 0.05$ , †  $p < 0.01$ , and ‡  $p < 0.001$ .

**Table S13.** The absolute and the relative weight of the left kidney of rats.

| Group                                        | Experiment Duration       |                           |                           |                           |
|----------------------------------------------|---------------------------|---------------------------|---------------------------|---------------------------|
|                                              | 3 Months                  | 10 Months                 | 17 Months                 | 24 Months                 |
| Absolute Weight of the Kidney (g)            |                           |                           |                           |                           |
| Control                                      | 0.9420<br>0.8595 – 1.0100 | 0.9292<br>0.8075 – 1.0274 | 1.1014<br>0.9994 – 1.4990 | 1.3065<br>1.1163 – 2.0292 |
| AM                                           | 1.0005<br>0.8176 – 1.0691 | 0.9575<br>0.8781 – 1.0104 | 1.2544<br>0.8618 – 1.5903 | 1.1884<br>0.9532 – 1.9371 |
| Cd <sub>1</sub>                              | 0.8962<br>0.4648 – 0.9746 | 0.9794<br>0.8703 – 1.0617 | 1.1659<br>0.9084 – 1.8407 | 1.3195<br>1.2592 – 1.4661 |
| Cd <sub>1</sub> +AM                          | 0.9098<br>0.8226 – 1.0242 | 0.9848<br>0.8094 – 1.0719 | 1.1322<br>0.9154 – 1.2132 | 1.3463<br>1.1764 – 1.6897 |
| Cd <sub>5</sub>                              | 0.9021<br>0.8628 – 1.0535 | 1.0326<br>0.5309 – 1.1813 | 1.0986<br>1.0553 – 1.4936 | 1.3646<br>1.2528 – 1.6199 |
| Cd <sub>5</sub> +AM                          | 0.8806<br>0.7716 – 1.0770 | 0.9223<br>0.8183 – 1.0479 | 1.1244<br>1.0384 – 1.3111 | 1.1801<br>1.0834 – 1.2960 |
| Relative Weight of the Kidney (g/100 g b.w.) |                           |                           |                           |                           |
| Control                                      | 0.3032<br>0.2732 – 0.3222 | 0.2104<br>0.1963 – 0.2581 | 0.2209<br>0.1562 – 0.3407 | 0.1937<br>0.1786 – 0.3624 |
| AM                                           | 0.3128<br>0.2937 – 0.3300 | 0.2170<br>0.1792 – 0.2536 | 0.2460<br>0.1413 – 0.3181 | 0.2246<br>0.1467 – 0.3522 |
| Cd <sub>1</sub>                              | 0.3054<br>0.1592 – 0.3387 | 0.2200<br>0.2868 – 0.2485 | 0.2451<br>0.1748 – 0.4184 | 0.1884<br>0.1672 – 0.2865 |
| Cd <sub>1</sub> +AM                          | 0.3117<br>0.2856 – 0.3556 | 0.2153<br>0.1655 – 0.2666 | 0.2246<br>0.1695 – 0.2639 | 0.2666<br>0.2262 – 0.3096 |
| Cd <sub>5</sub>                              | 0.3005<br>0.2818 – 0.4130 | 0.2501<br>0.1144 – 0.2774 | 0.2386<br>0.1505 – 0.4268 | 0.2481<br>0.2085 – 0.2793 |
| Cd <sub>5</sub> +AM                          | 0.2825<br>0.2660 – 0.3121 | 0.2272<br>0.1819 – 0.2501 | 0.2323<br>0.1783 – 0.2914 | 0.2123<br>0.1708 – 0.2875 |

The animals were treated with cadmium (Cd) in the diet at the concentration of 0, 1, or 5 mg/kg (Control, Cd<sub>1</sub>, and Cd<sub>5</sub> groups) and/or 0.1% extract from the berries of *Aronia melanocarpa* L. (AM, Cd<sub>1</sub>+AM, and Cd<sub>5</sub>+AM groups) for 3, 10, 17, and 24 months. Data are shown as a median and minimum and maximum values for eight animals (except for seven females in the AM, Cd<sub>1</sub>, and Cd<sub>5</sub> groups after 24 months). There were no statistically significant differences (Kruskal-Wallis test) between the experimental groups.

**Table S14.** The concentrations of chemerin, macrophage inflammatory protein 1a (MIP1a), and Bcl2-associated X protein (Bax) in the kidney of female rats.

| Group                    | Experiment Duration      |                               |                        |                           |
|--------------------------|--------------------------|-------------------------------|------------------------|---------------------------|
|                          | 3 Months                 | 10 Months                     | 17 Months              | 24 Months                 |
| Chemerin (pg/mg Protein) |                          |                               |                        |                           |
| Control                  | 29.82                    | 14.68                         | 16.09                  | 16.41                     |
|                          | 26.91 – 39.83            | 11.78 – 19.82                 | 14.90 – 17.66          | 14.25 – 17.59             |
| AM                       | 22.84                    | 14.01                         | 14.90                  | 15.62                     |
|                          | 10.91 – 33.76            | 7.282 – 26.61                 | 10.93 – 19.28          | 12.98 – 19.15             |
| Cd <sub>1</sub>          | 28.12                    | 16.73                         | 20.54                  | 38.85 <sup>a*</sup>       |
|                          | 21.67 – 86.31            | 10.81 – 56.95                 | 18.10 – 22.05          | 28.27 – 40.15             |
| Cd <sub>1</sub> +AM      | 22.02                    | 12.35                         | 16.81                  | 11.75 <sup>‡</sup>        |
|                          | 7.063 – 32.88            | 7.414 – 25.75                 | 15.88 – 17.86          | 9.142 – 13.92             |
| Cd <sub>5</sub>          | 32.35                    | 18.78                         | 22.22 <sup>a† b†</sup> | 37.69 <sup>a* ‡</sup>     |
|                          | 23.04 – 47.10            | 11.32 – 38.81                 | 19.32 – 23.71          | 35.44 – 41.36             |
| Cd <sub>5</sub> +AM      | 11.56 <sup>a† ‡ ‡</sup>  | 2.887 <sup>a* b* ‡ d* ‡</sup> | 10.43 <sup>‡ ‡</sup>   | 10.86 <sup>‡ ‡</sup>      |
|                          | 6.634 – 19.81            | 1.174 – 5.572                 | 9.596 – 12.57          | 9.288 – 11.47             |
| MIP1a (ng/mg Protein)    |                          |                               |                        |                           |
| Control                  | 2.168                    | 1.138                         | 1.223                  | 0.837                     |
|                          | 1.162 – 3.504            | 0.840 – 2.996                 | 0.874 – 1.826          | 0.683 – 1.196             |
| AM                       | 1.652                    | 1.065                         | 0.587                  | 0.266                     |
|                          | 0.829 – 2.250            | 0.912 – 2.478                 | 0.269 – 0.977          | 0.128 – 0.425             |
| Cd <sub>1</sub>          | 1.984                    | 1.390                         | 0.941                  | 1.000                     |
|                          | 0.919 – 2.536            | 0.920 – 3.180                 | 0.585 – 1.604          | 0.792 – 2.020             |
| Cd <sub>1</sub> +AM      | 1.441                    | 0.754                         | 0.260 <sup>a† c*</sup> | 0.190 <sup>a* ‡</sup>     |
|                          | 0.761 – 2.281            | 0.647 – 1.150                 | 0.036 – 0.331          | 0.144 – 0.213             |
| Cd <sub>5</sub>          | 0.930 <sup>a† c*</sup>   | 2.172 <sup>d†</sup>           | 1.618 <sup>b* d†</sup> | 1.266                     |
|                          | 0.721 – 1.125            | 1.776 – 2.462                 | 1.218 – 2.604          | 0.942 – 2.076             |
| Cd <sub>5</sub> +AM      | 0.890 <sup>a† ‡</sup>    | 0.717 <sup>a* c* ‡</sup>      | 0.316 <sup>a† ‡</sup>  | 0.169 <sup>a* ‡</sup>     |
|                          | 0.751 – 0.968            | 0.567 – 0.859                 | 0.094 – 0.520          | 0.102 – 0.262             |
| Bax (ng/mg Protein)      |                          |                               |                        |                           |
| Control                  | 5.412                    | 2.651                         | 2.661                  | 1.938                     |
|                          | 3.381 – 6.340            | 0.465 – 4.571                 | 1.728 – 3.572          | 1.307 – 2.420             |
| AM                       | 3.830                    | 2.974                         | 1.853                  | 1.387                     |
|                          | 3.023 – 6.722            | 1.785 – 3.605                 | 0.914 – 2.550          | 1.181 – 2.502             |
| Cd <sub>1</sub>          | 5.607                    | 3.075                         | 5.792                  | 2.231                     |
|                          | 3.293 – 7.317            | 2.393 – 6.568                 | 3.637 – 12.47          | 1.617 – 3.876             |
| Cd <sub>1</sub> +AM      | 3.120                    | 1.924 <sup>c*</sup>           | 1.052 <sup>‡</sup>     | 1.096 <sup>c*</sup>       |
|                          | 1.638 – 5.257            | 1.046 – 2.597                 | 0.532 – 1.607          | 0.922 – 1.877             |
| Cd <sub>5</sub>          | 2.780                    | 19.990                        | 3.839 <sup>d†</sup>    | 2.732 <sup>a* b* d†</sup> |
|                          | 2.456 – 3.594            | 1.718 – 2.215                 | 2.552 – 4.915          | 2.442 – 5.216             |
| Cd <sub>5</sub> +AM      | 1.469 <sup>a† b† ‡</sup> | 1.195 <sup>b† ‡</sup>         | 1.186 <sup>‡ ‡</sup>   | 1.452 <sup>‡</sup>        |
|                          | 0.736 – 1.614            | 1.031 – 2.163                 | 0.911 – 1.668          | 1.004 – 2.002             |

The animals were treated with cadmium (Cd) in the diet at the concentration of 0, 1, or 5 mg/kg (Control, Cd<sub>1</sub>, and Cd<sub>5</sub> groups) and/or 0.1% extract from the berries of *Aronia melanocarpa* L. (AM, Cd<sub>1</sub>+AM, and Cd<sub>5</sub>+AM groups) for 3, 10, 17, and 24 months. Data are shown as a median and minimum and maximum values for eight animals (except for seven females in the AM, Cd<sub>1</sub>, and Cd<sub>5</sub> groups after 24 months). Statistically significant differences (Kruskal–Wallis test) compared to: a—Control group; b—AM group; c—Cd<sub>1</sub> group; d—Cd<sub>1</sub>+AM group; and e—Cd<sub>5</sub> group, where \*  $p < 0.05$ , †  $p < 0.01$ , and ‡  $p < 0.001$ , are marked.

**Table S15.** The concentration of cadmium (Cd) in the blood, urine, and kidney of female rats <sup>1,2</sup>.

| Group                             | Experiment Duration                                 |                                                      |                                                       |                                                      |
|-----------------------------------|-----------------------------------------------------|------------------------------------------------------|-------------------------------------------------------|------------------------------------------------------|
|                                   | 3 Months                                            | 10 Months                                            | 17 Months                                             | 24 Months                                            |
| <b>Blood (µg Cd/L)</b>            |                                                     |                                                      |                                                       |                                                      |
| Control                           | 0.0691<br>0.0330 – 0.1110                           | 0.0860<br>0.0360 – 0.1290                            | 0.0744<br>0.0480 – 0.0960                             | 0.0834<br>0.0690 – 0.0990                            |
| AM                                | 0.0752<br>0.0500 – 0.0960                           | 0.0802<br>0.0330 – 0.1360                            | 0.0718<br>0.0103 – 0.0950                             | 0.0861<br>0.0700 – 0.0970                            |
| Cd <sub>1</sub>                   | 0.1884<br>0.1320 – 0.2460                           | 0.1792<br>0.1030 – 0.3060                            | 0.2425<br>0.1980 – 0.3240                             | 0.2330<br>0.1850 – 0.2840                            |
| Cd <sub>1</sub> +AM               | ↑ 2.7x<br>0.1877<br>0.1290 – 0.2480                 | ↑ 2.1x<br>0.1844<br>0.1170 – 0.2760                  | ↑ 3.3x<br>0.2375<br>0.1610 – 0.3050                   | ↑ 2.8x<br>0.2189<br>0.1900 – 0.3000                  |
| Cd <sub>5</sub>                   | ↑ 2.7x<br>1.0236<br>0.7390 – 1.3320                 | ↑ 2.1x<br>0.9394<br>0.7350 – 1.1220                  | ↑ 3.2x<br>1.0339<br>0.9400 – 1.1310                   | ↑ 2.6x<br>1.0467<br>0.8250 – 1.2010                  |
| Cd <sub>5</sub> +AM               | ↑ 14.8x<br>0.8298<br>0.6200 – 1.0640<br>↑ 12x ↓ 19% | ↑ 10.9x<br>0.7948<br>0.5840 – 0.9960<br>↑ 9.2x ↓ 15% | ↑ 13.9x<br>0.9319<br>0.7920 – 1.1250<br>↑ 12.5x ↓ 10% | ↑ 12.6x<br>0.8201<br>0.6090 – 1.1490<br>↑ 9.8x ↓ 22% |
| <b>Urine (µg Cd/g Creatinine)</b> |                                                     |                                                      |                                                       |                                                      |
| Control                           | 0.1387<br>0.1032 – 0.2013                           | 0.1304<br>0.0944 – 0.1722                            | 0.1491<br>0.1172 – 0.1889                             | 0.1337<br>0.0764 – 0.1937                            |
| AM                                | 0.1321<br>0.1129 – 0.1507                           | 0.1364<br>0.1119 – 0.1558                            | 0.1445<br>0.0730 – 0.1712                             | 0.1357<br>0.1118 – 0.1618                            |
| Cd <sub>1</sub>                   | 0.2184<br>0.1810 – 0.2509                           | 0.1809<br>0.0852 – 0.2558                            | 0.2096<br>0.1069 – 0.2820                             | 0.2053<br>0.1795 – 0.2451                            |
| Cd <sub>1</sub> +AM               | ↑ 57%<br>0.2193<br>0.1349 – 0.2762                  | ↑ 39%<br>0.1913<br>0.1392 – 0.2483                   | ↑ 41%<br>0.2143<br>0.1471 – 0.3538                    | ↑ 54%<br>0.2084<br>0.1794 – 0.2531                   |
| Cd <sub>5</sub>                   | ↑ 58%<br>0.5008<br>0.4183 – 0.6016                  | ↑ 47%<br>0.4002<br>0.2839 – 0.6949                   | ↑ 44%<br>0.4737<br>0.3369 – 0.6467                    | ↑ 56%<br>0.4104<br>0.3110 – 0.4695                   |
| Cd <sub>5</sub> +AM               | ↑ 3.6x<br>0.6064<br>0.4833 – 0.8197<br>↑ 4.4x ↗ 21% | ↑ 3.1x<br>0.4997<br>0.3640 – 0.6812<br>↑ 3.8x ↗ 25%  | ↑ 3.2x<br>0.5773<br>0.4206 – 0.7481<br>↑ 3.9x ↗ 22%   | ↑ 3.1x<br>0.4994<br>0.4308 – 0.6616<br>↑ 3.7x ↗ 22%  |
| <b>Kidney (µg Cd/g)</b>           |                                                     |                                                      |                                                       |                                                      |
| Control                           | 0.0385<br>0.0283 – 0.0618                           | 0.0505<br>0.0385 – 0.0619                            | 0.0467<br>0.0364 – 0.0644                             | 0.0844<br>0.0452 – 0.1382                            |
| AM                                | 0.0355<br>0.0282 – 0.0425                           | 0.0491<br>0.0308 – 0.0614                            | 0.0555<br>0.0454 – 0.0677                             | 0.0930<br>0.0599 – 0.1396                            |
| Cd <sub>1</sub>                   | 0.3482<br>0.2626 – 0.4472                           | 1.1342<br>0.8769 – 1.4298                            | 1.2126<br>0.7714 – 1.8262                             | 1.9807<br>1.0909 – 2.8322                            |
| Cd <sub>1</sub> +AM               | ↑ 9x<br>0.2475<br>0.1666 – 0.3018<br>↑ 6.4x ↓ 29%   | ↑ 22x<br>1.0277<br>0.7600 – 1.1772<br>↑ 20x ↓ 9.5%   | ↑ 26x<br>1.3048<br>1.1193 – 1.5348<br>↑ 28x           | ↑ 23x<br>2.0533<br>1.2735 – 2.9219<br>↑ 24x          |
| Cd <sub>5</sub>                   | ↑ 36x<br>1.3714<br>0.9739 – 1.6725                  | ↑ 96x<br>4.8425<br>4.2892 – 6.1790                   | ↑ 231x<br>10.7680<br>8.4189 – 14.8705                 | ↑ 95x<br>8.0093<br>6.5652 – 8.8627                   |
| Cd <sub>5</sub> +AM               | ↑ 31x ↓ 14%<br>1.1805<br>0.9976 – 1.4006            | ↑ 91x ↓ 5.6%<br>4.5712<br>3.5350 – 5.1680            | ↑ 207x ↓ 10%<br>9.6644<br>8.2900 – 11.7654            | ↑ 87x ↓ 8.8%<br>7.3042<br>5.7523 – 8.6859            |

The animals were treated with cadmium (Cd) in the diet at the concentration of 0, 1, or 5 mg/kg (Control, Cd<sub>1</sub>, and Cd<sub>5</sub> groups) and/or 0.1% extract from the berries of *Aronia melanocarpa* L. (AM, Cd<sub>1</sub>+AM, and Cd<sub>5</sub>+AM groups) for 3, 10, 17, and 24 months. Data are shown as a mean and minimum and maximum values for eight animals (with the exception of seven females in the AM, Cd<sub>1</sub>,

and Cd<sub>5</sub> groups after 24 months). The factors or percentages of changes compared to the control group (↑, increase) or the adequate group treated with Cd alone (↘, decrease; ↗, increase) are indicated if  $p < 0.05$ . <sup>1</sup> prepared based on Brzóska, M.M.; Gałążyn-Sidorczuk, M.; Jurczuk, M.; Tomczyk, M. Protective effect of *Aronia melanocarpa* polyphenols on cadmium accumulation in the body: A study in a rat model of human exposure to this metal. *Curr. Drug Targets* **2015**, *16*, 1470–1487. <https://doi.org/10.2174/1389450116666150102121708>. <sup>2</sup> Cd concentration in the blood and urine was also presented in the Supplementary Material for the article Mężyńska, M.; Brzóska, M.M.; Rogalska, J.; Piłat-Marcinkiewicz, B. Extract from *Aronia melanocarpa* L. berries prevents cadmium-induced oxidative stress in the liver: A study in a rat model of low-level and moderate lifetime human exposure to this toxic metal. *Nutrients* **2019**, *11*, 21. <https://doi.org/10.3390/nu11010021>.



mAU

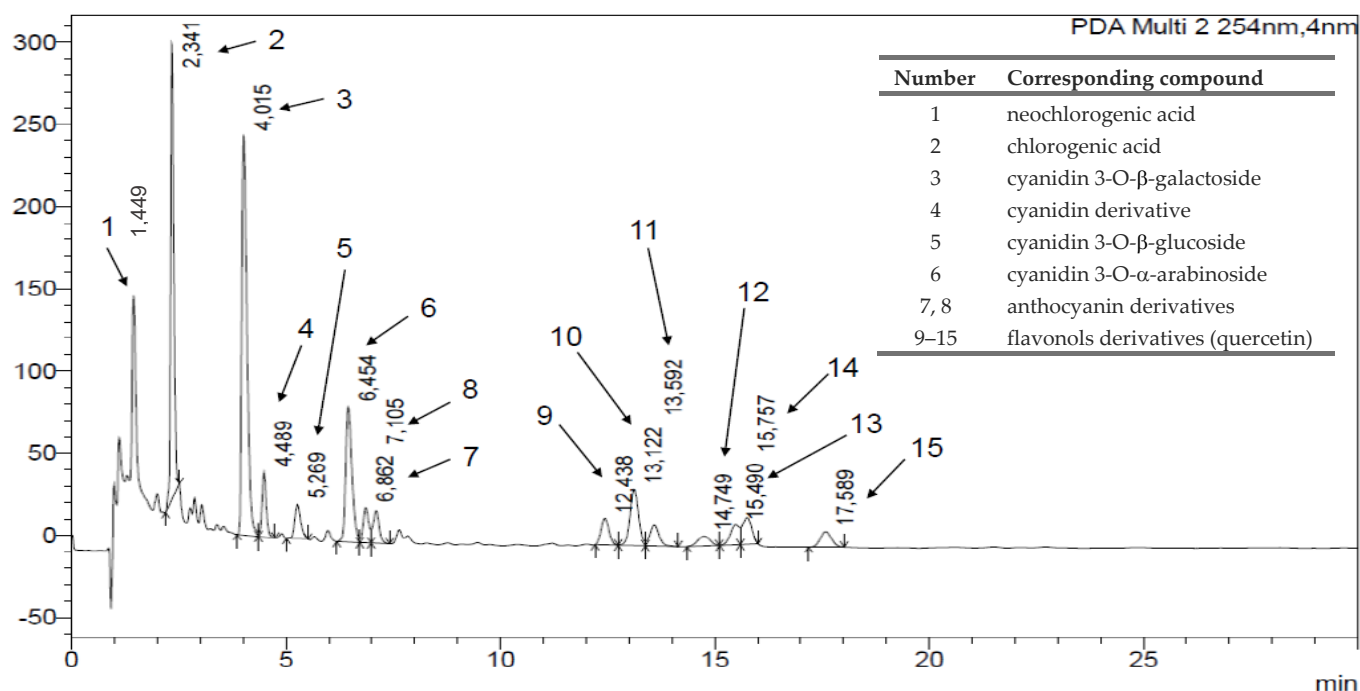

**Figure S1.** Ultra Performance Liquid Chromatography (UPLC) polyphenolic profile of the *Aronia melanocarpa* L. berry extract. The profile of the extract was investigated and presented in Brzóska, M.M.; Rogalska, J.; Gałążyn-Sidorczuk, M.; Jurczuk, M.; Roszczenko, A.; Tomczyk, M. Protective effect of *Aronia melanocarpa* polyphenols against cadmium-induced disorders in bone metabolism: A study in a rat model of lifetime human exposure to this heavy metal. *Chem. Biol. Interact.* **2015**, 229, 132–146. <https://doi.org/10.1016/j.cbi.2015.01.031>.
